# Supplementary material for: The genome of Prunus mume
Source: PubMed Central journal article supplement — Nat Commun. 2012 Dec 27;3:1318–. doi: 10.1038/ncomms2290 (PMC3535359; doi:10.1038/ncomms2290), 2012-12-27
Supplement: ncomms2290-s1.pdf [file ncomms2290-s1.pdf]

## **Supplementary Information**

### **The genome of *Prunus mume***

Qixiang Zhang<sup>1,6,\*</sup>, Wenbin Chen<sup>2,6</sup>, Lidan Sun<sup>1,6</sup>, Fangying Zhao<sup>3,6</sup>, Bangqing Huang<sup>2,6</sup>, Weiru Yang<sup>1</sup>, Ye Tao<sup>2</sup>, Jia Wang<sup>4</sup>, Zhiqiong Yuan<sup>3</sup>, Guangyi Fan<sup>2</sup>, Zhen Xing<sup>5</sup>, Changlei Han<sup>2</sup>, Huitang Pan<sup>1</sup>, Xiao Zhong<sup>2</sup>, Wenfang Shi<sup>1</sup>, Xinming Liang<sup>2</sup>, Dongliang Du<sup>1</sup>, Fengming Sun<sup>2</sup>, Zongda Xu<sup>1</sup>, Ruijie Hao<sup>1</sup>, Tian Lv<sup>2</sup>, Yingmin Lv<sup>1</sup>, Zequn Zheng<sup>2</sup>, Ming Sun<sup>1</sup>, Le Luo<sup>1</sup>, Ming Cai<sup>1</sup>, Yike Gao<sup>1</sup>, Junyi Wang<sup>2</sup>, Ye Yin<sup>2</sup>, Xun Xu<sup>2</sup>, Tangren Cheng<sup>4,\*</sup>, Jun Wang<sup>2,\*</sup>

### **Inventory of Supplementary Information:**

Supplementary Figures S1-S9

Supplementary Tables S1-S22

Supplementary Methods

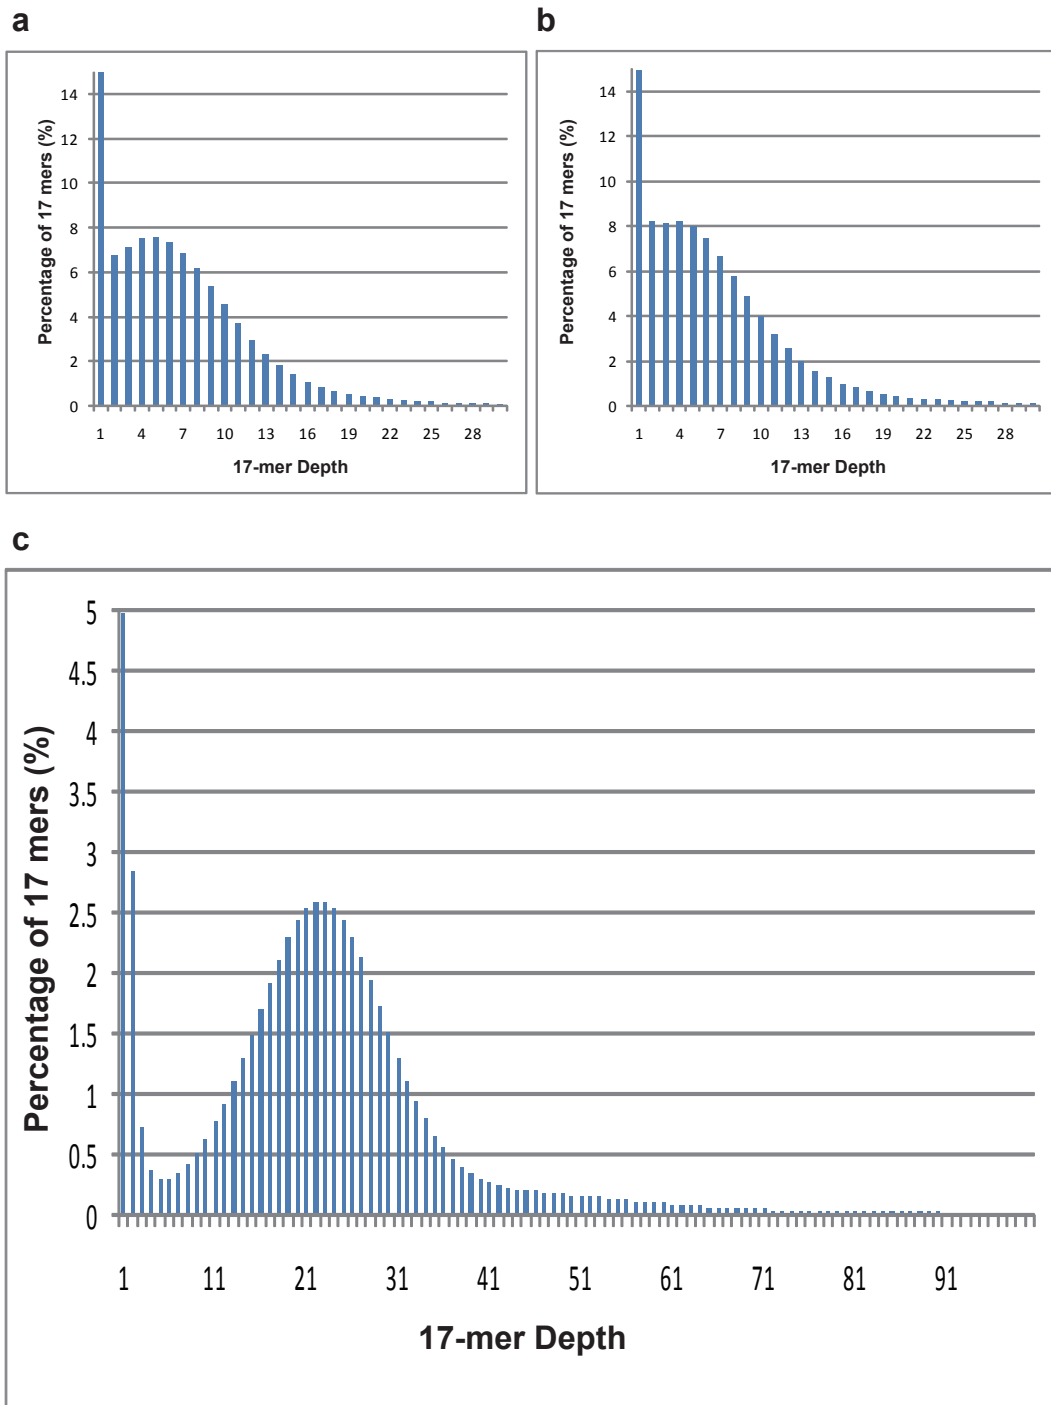

**Supplementary Figure S1. K-mer analysis.**

a) and b) estimating the domesticated samples, c) estimating the wild *P. mume* sample used for genome assembly. The x-axis is depth (X); the y-axis is the proportion that represents the percentage at that depth. (Without consideration of the sequence error rate, heterozygosity rate and repeat rate of the genome, the 17-mer distribution should obey the Poisson theoretical distribution. In the actual data, due to the sequence error, the low depth of 17-mer will take up a large proportion.)

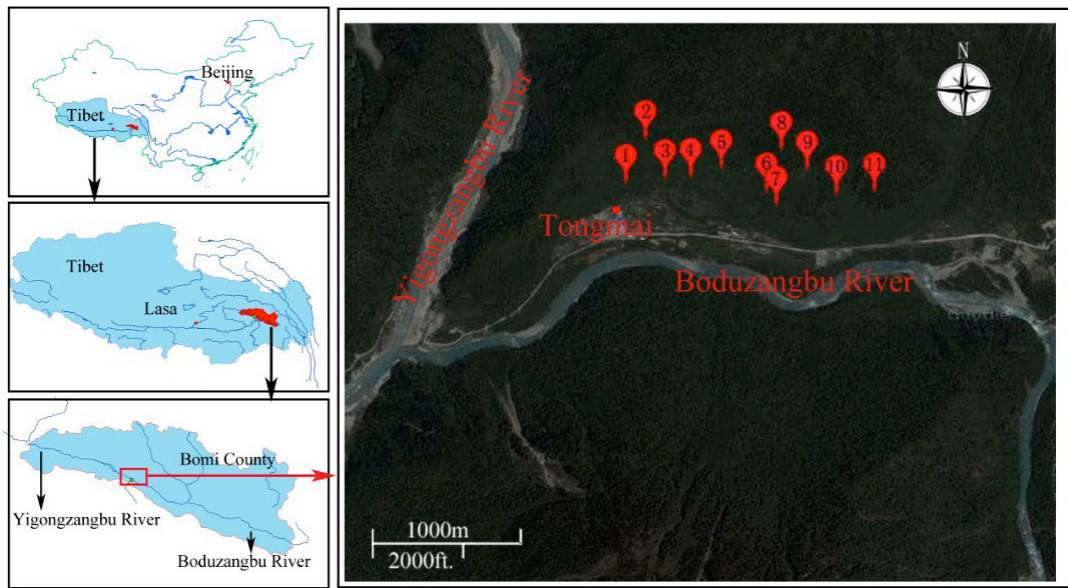

**Supplementary Figure S2. The sample distribution map of GPS for *P. mume* in Tongmai town Tibet China.**

Number 4 ( $30^{\circ}06'14''\text{N}$ ,  $95^{\circ}05'8''\text{E}$ ) is the location of the sample used for *P. mume* sequencing.

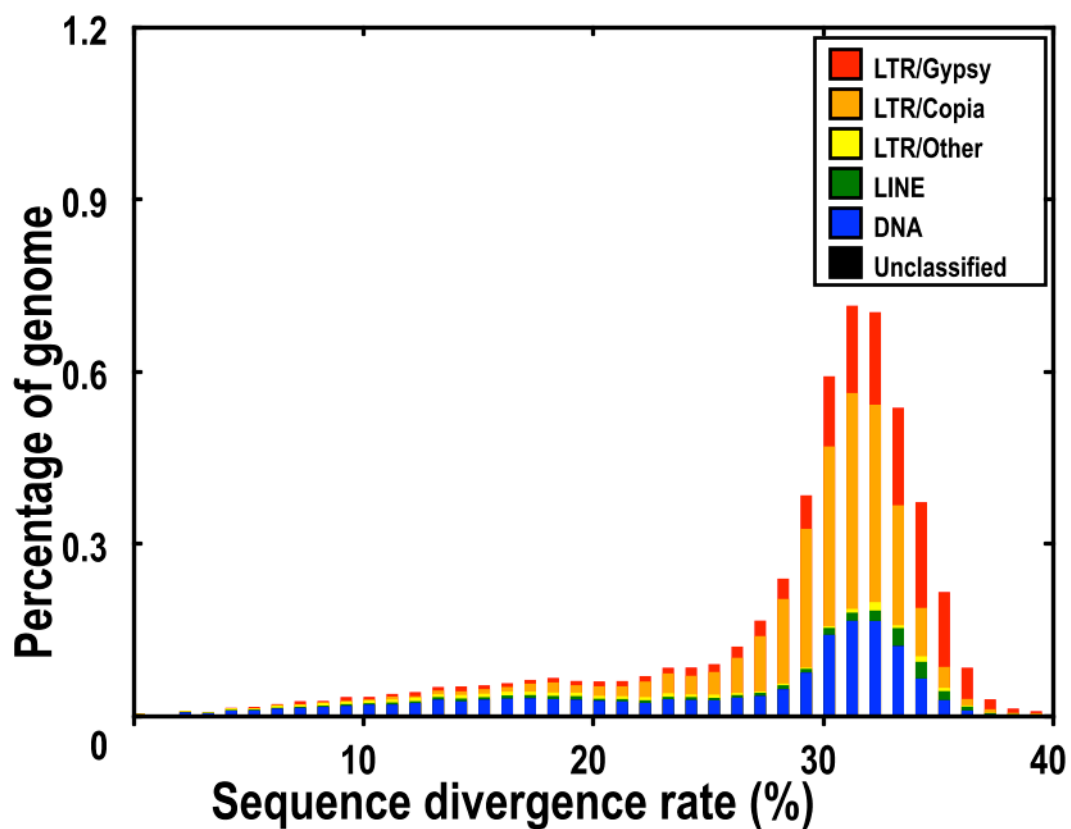

**Supplementary Figure S3. Divergence rates of the transposable elements in the assembled scaffolds.**

The divergence rate was calculated based on the alignment between the RepeatMasker annotated repeat copies and the consensus sequence in the repeat library.

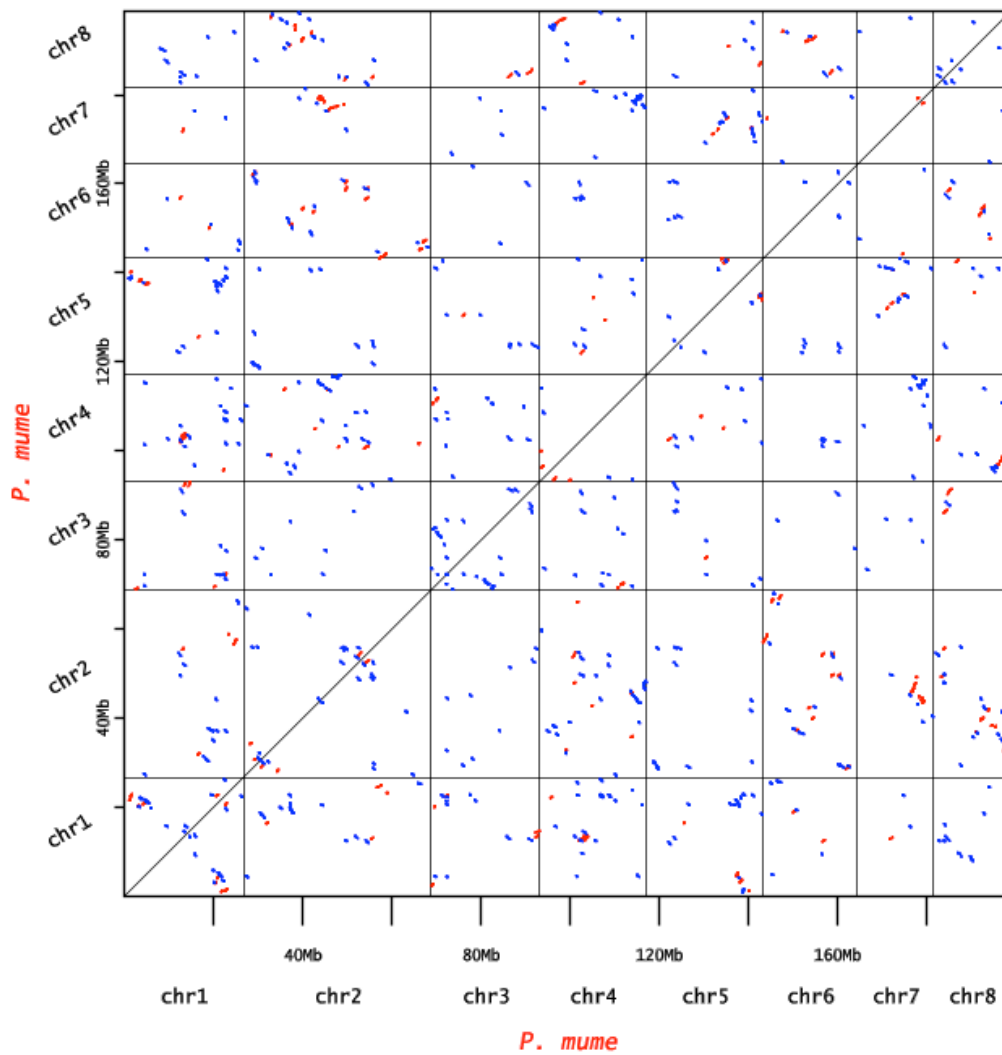

**Supplementary Figure S4. Whole-genome duplication in the *P. mume* genome mapped using gene collinear order information.**

Syntenic blocks are formed by red or blue dots representing best hits across any two chromosomes in the same or opposite direction, respectively.

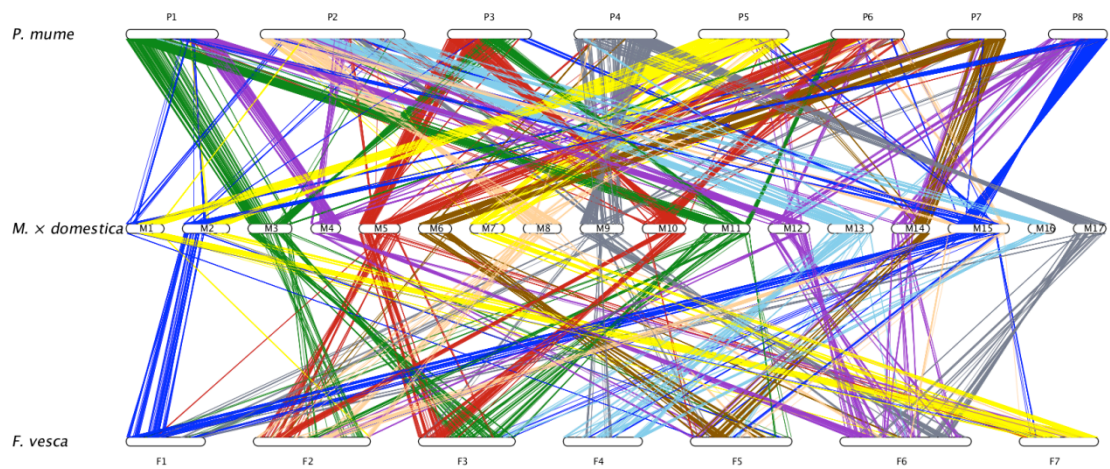

**Supplementary Figure S5. The synteny between *P. mume*, *F. vesca* and *M. × domestica*.**

Schematic representation of the orthologs identified between *P. mume* (P1 to P8), *F. vesca* (F1 to F7) and *M. × domestica* (M1 to M17). Each line represents an orthologous gene. The nine different colors represent the blocks reflect the origin from the nine ancestral rosaceae linkage groups.

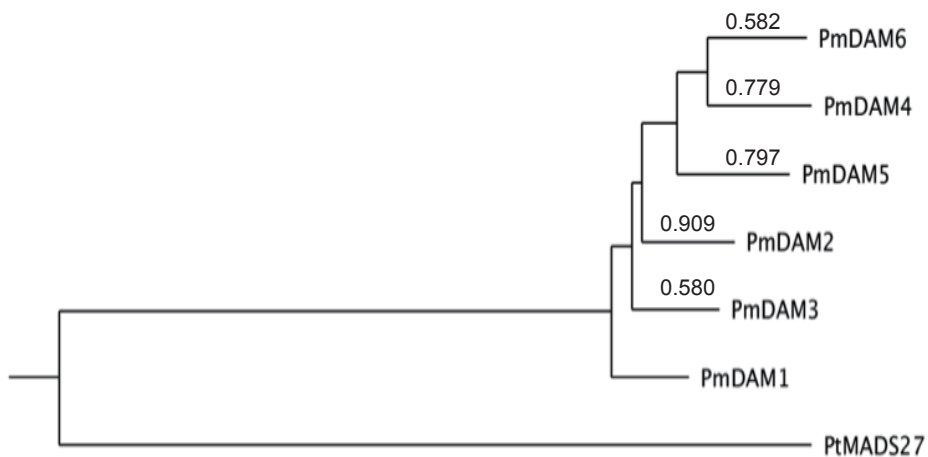

**Supplementary Figure S6. Maximum likelihood rooted tree of 6 *P. mume* DAM genes.**

The average ratio over all sites were shown on branches and PtMADS27 was used as outgroup.

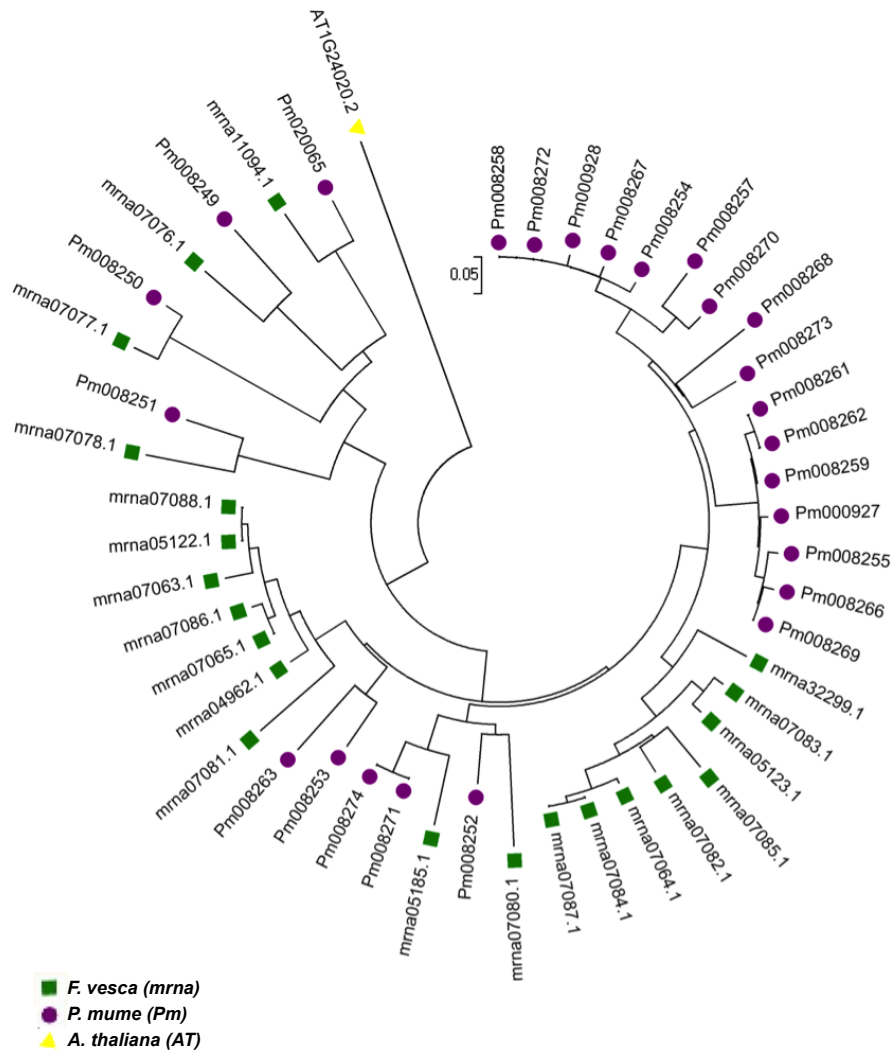

**Supplementary Figure S7. Phylogenetic relationships of PR10 genes in *P. mume* (Pm) *F. vesca* (mrna) and *A. thaliana* (AT).**

The phylogenetic tree was constructed using the Neighbor Joining Method with Mega 4.0 software.

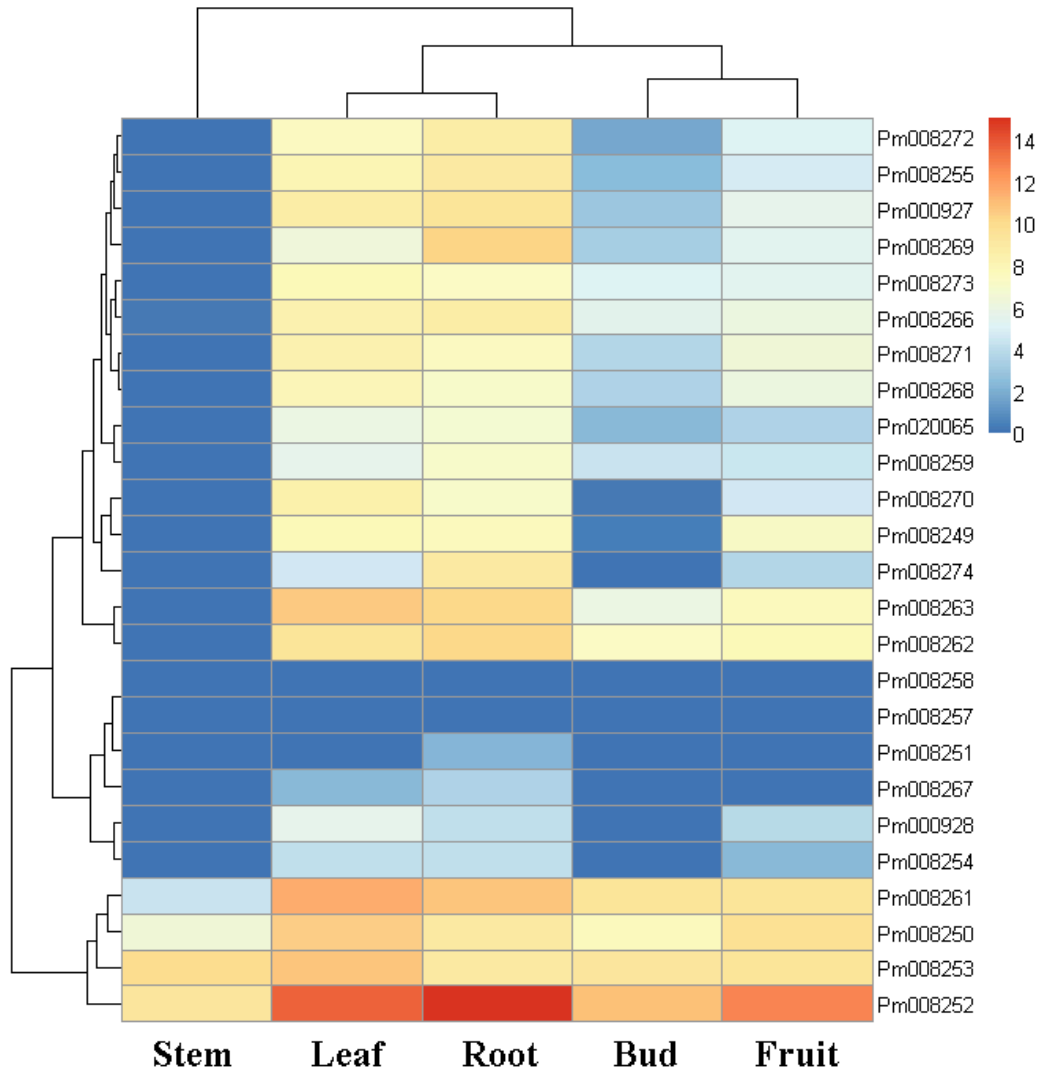

**Supplementary Figure S8. Relative expression of PR10 genes in tissues.**  
The colors represent different RPKM value.



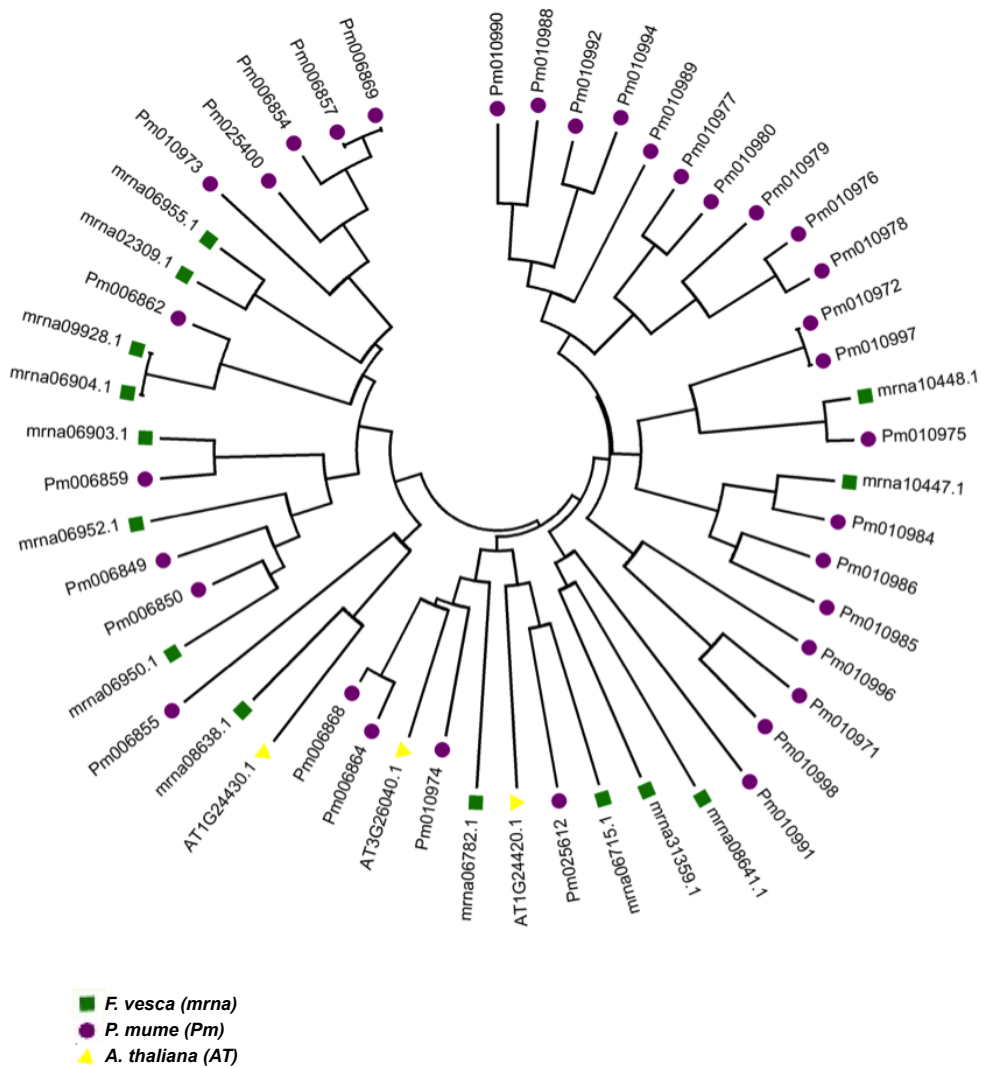

**Supplementary Figure S9. Phylogenetic relationships of BEAT genes in *P. mume* (Pm) *F. vesca* (mrna) and *A. thaliana* (AT).**

The phylogenetic tree was constructed using the Neighbor Joining Method with Mega 4.0 software.

**Supplementary Table S1. The sequencing data of the two domesticated *P. mume*.**

| NO. | Library insert size (bp) | Read length (bp) | Raw data        |                                 |                                 | Filtered data   |                                 |                                 |
|-----|--------------------------|------------------|-----------------|---------------------------------|---------------------------------|-----------------|---------------------------------|---------------------------------|
|     |                          |                  | Total data (Gb) | Sequence depth (X) <sup>a</sup> | Physical depth (X) <sup>a</sup> | Total data (Gb) | Sequence depth (X) <sup>a</sup> | Physical depth (X) <sup>a</sup> |
| 1   | 500                      | 90PE             | 2.6             | 9.3                             | 22.7                            | 2.2             | 7.8                             | 21.8                            |
| 2   | 500                      | 90PE             | 2.9             | 10.4                            | 28.8                            | 2.3             | 8.2                             | 22.9                            |

<sup>a</sup> Assumed genome size is 280 Mb.

\* Physical depth= Physical coverage length/ Genome size.

**Supplementary Table S2. Construction of libraries generation and filtering of sequencing data for genome assembly used.**

| Library insert size (bp) | Read length (bp) | Raw data        |                    |                    | Filtered data   |                                 |                                 |
|--------------------------|------------------|-----------------|--------------------|--------------------|-----------------|---------------------------------|---------------------------------|
|                          |                  | Total data (Gb) | Sequence depth (X) | Physical depth (X) | Total data (Gb) | Sequence depth (X) <sup>a</sup> | Physical depth (X) <sup>a</sup> |
| 180                      | 100PE            | 6.6             | 23.6               | 21.2               | 6.1             | 21.8                            | 19.6                            |
| 500                      | 150PE            | 10.2            | 36.4               | 60.8               | 7.1             | 25.4                            | 42.2                            |
| 800                      | 100PE            | 3.7             | 13.2               | 52.8               | 3.0             | 10.7                            | 42.9                            |
| 2000                     | 45PE             | 2.8             | 10.0               | 222.2              | 2.5             | 8.9                             | 198.4                           |
| 5000                     | 45PE             | 3.0             | 10.7               | 595.3              | 2.5             | 8.9                             | 496.1                           |
| 10000                    | 90PE             | 11.4            | 40.7               | 2,261.9            | 4.4             | 15.7                            | 873.0                           |
| 20000                    | 90PE             | 4.7             | 16.8               | 1,865.0            | 0.8             | 2.9                             | 317.5                           |
| 40000                    | 50PE             | 8.0             | 28.6               | 11,442.9           | 2.0             | 7.1                             | 2,871.4                         |
| Total                    |                  | 50.4            | 180.0              | 16,522.1           | 28.4            | 101.4                           | 4,861.1                         |

<sup>a</sup> Assumed genome size is 280 Mb.

**Supplementary Table S3. Statistics the heterozygosity rate of *P. mume*.**

| <b>Chromosome</b> | <b>Heterozygosity Site NO.</b> | <b>Valid site NO.</b> | <b>Heterozygosity rate</b> |
|-------------------|--------------------------------|-----------------------|----------------------------|
| <b>Chr1</b>       | 7,584                          | 24,146,087            | 0.0003                     |
| <b>Chr2</b>       | 9,715                          | 38,079,607            | 0.0003                     |
| <b>Chr3</b>       | 7,339                          | 21,896,908            | 0.0004                     |
| <b>Chr4</b>       | 6,224                          | 21,746,526            | 0.0003                     |
| <b>Chr5</b>       | 8,467                          | 23,619,679            | 0.0004                     |
| <b>Chr6</b>       | 5,976                          | 19,297,980            | 0.0003                     |
| <b>Chr7</b>       | 5,669                          | 15,339,843            | 0.0004                     |
| <b>Chr8</b>       | 3,824                          | 15,854,464            | 0.0002                     |
| <b>Total</b>      | 54,798                         | 179,981,094           | 0.0003                     |

**Supplementary Table S4. Chloroplast and mitochondrial sequences identification.**

Chloroplast

| <b>Scaffold ID</b> | <b>Scaffold length</b> | <b>Start-End</b> | <b>Target ID</b> | <b>Target length</b> | <b>Start-End2</b> |
|--------------------|------------------------|------------------|------------------|----------------------|-------------------|
| C4793941           | 253                    | 1-251            | NC_015206.1      | 155691               | 115485-115735     |
| C4793941           | 253                    | 1-253            | NC_015996.1      | 159922               | 119315-119567     |
| C4828461           | 303                    | 177-303          | NC_015996.1      | 159922               | 6633-6758         |
| C4835979           | 317                    | 151-301          | NC_015206.1      | 155691               | 39193-39341       |
| C4835979           | 317                    | 151-301          | NC_015996.1      | 159922               | 41145-41293       |
| C4865545           | 385                    | 253-385          | NC_015206.1      | 155691               | 43729-43868       |
| C4865545           | 385                    | 170-385          | NC_015996.1      | 159922               | 45613-45831       |
| C4885025           | 448                    | 266-413          | NC_015206.1      | 155691               | 4610-4754         |
| C4885025           | 448                    | 1-135            | NC_015996.1      | 159922               | 4242-4380         |
| C4885565           | 450                    | 59-271           | NC_015206.1      | 155691               | 49609-49816       |
| scaffold1456       | 7735                   | 6784-6954        | NC_000932.1      | 154478               | 4178-4348         |
| scaffold1456       | 7735                   | 1-7012           | NC_015206.1      | 155691               | 4074-11480        |
| scaffold1456       | 7735                   | 1-7735           | NC_015996.1      | 159922               | 3317-11725        |
| scaffold1583       | 881                    | 4-617            | NC_015206.1      | 155691               | 12109-12719       |
| scaffold1583       | 881                    | 1-881            | NC_015996.1      | 159922               | 12351-13233       |
| scaffold762        | 5943                   | 173-4100         | NC_000932.1      | 154478               | 42581-131125      |
| scaffold762        | 5943                   | 1-5805           | NC_015206.1      | 155691               | 42713-132548      |
| scaffold762        | 5943                   | 1-5943           | NC_015996.1      | 159922               | 44665-136394      |
| scaffold836        | 24969                  | 1473-20991       | NC_000932.1      | 154478               | 79478-154472      |
| scaffold836        | 24969                  | 1-24895          | NC_015206.1      | 155691               | 79318-155678      |
| scaffold836        | 24969                  | 1-24969          | NC_015996.1      | 159922               | 81615-159823      |

Mitochondrial

| <b>Scaffold ID</b> | <b>Scaffold length</b> | <b>Start-End</b> | <b>Target ID</b> | <b>Target length</b> | <b>Start-End2</b> |
|--------------------|------------------------|------------------|------------------|----------------------|-------------------|
| C4791761           | 250                    | 8-250            | NC_001284.2      | 366924               | 289018-289264     |

|          |     |         |             |        |               |
|----------|-----|---------|-------------|--------|---------------|
| C4791761 | 250 | 1-250   | NC_012116.1 | 476890 | 132668-132916 |
| C4791761 | 250 | 3-250   | NC_012119.1 | 773279 | 452344-452590 |
| C4791761 | 250 | 1-250   | NC_016743.2 | 380861 | 2888-3130     |
| C4795609 | 255 | 41-242  | NC_001284.2 | 366924 | 53731-53934   |
| C4795609 | 255 | 2-253   | NC_012116.1 | 476890 | 207580-207832 |
| C4795609 | 255 | 12-253  | NC_012119.1 | 773279 | 50991-51238   |
| C4795609 | 255 | 1-255   | NC_016743.2 | 380861 | 153852-319122 |
| C4798175 | 258 | 1-258   | NC_001284.2 | 366924 | 302855-303112 |
| C4798175 | 258 | 1-258   | NC_012116.1 | 476890 | 58731-58988   |
| C4798175 | 258 | 1-254   | NC_012119.1 | 773279 | 582880-583133 |
| C4798175 | 258 | 3-258   | NC_016743.2 | 380861 | 194762-195017 |
| C4799013 | 259 | 1-259   | NC_001284.2 | 366924 | 142414-142668 |
| C4799013 | 259 | 1-259   | NC_012116.1 | 476890 | 77753-78012   |
| C4799013 | 259 | 1-259   | NC_012119.1 | 773279 | 191223-191481 |
| C4799013 | 259 | 1-255   | NC_016743.2 | 380861 | 73014-73266   |
| C4800347 | 261 | 116-261 | NC_012119.1 | 773279 | 285040-285188 |
| C4805963 | 268 | 1-268   | NC_001284.2 | 366924 | 52471-52738   |
| C4805963 | 268 | 1-268   | NC_012116.1 | 476890 | 14638-14905   |
| C4805963 | 268 | 1-268   | NC_012119.1 | 773279 | 121930-122197 |
| C4805963 | 268 | 1-268   | NC_016743.2 | 380861 | 226945-227212 |
| C4816843 | 284 | 68-284  | NC_016743.2 | 380861 | 15696-15903   |
| C4821391 | 291 | 29-288  | NC_012119.1 | 773279 | 408294-408564 |
| C4834719 | 314 | 43-306  | NC_012116.1 | 476890 | 114210-114472 |
| C4836839 | 318 | 1-185   | NC_001284.2 | 366924 | 8943-9128     |
| C4836839 | 318 | 1-185   | NC_016743.2 | 380861 | 211954-212138 |
| C4841479 | 327 | 3-281   | NC_012116.1 | 476890 | 450337-450615 |
| C4841479 | 327 | 3-285   | NC_012119.1 | 773279 | 493994-494276 |
| C4842125 | 329 | 1-329   | NC_012116.1 | 476890 | 208914-209251 |
| C4848941 | 343 | 1-343   | NC_012116.1 | 476890 | 16513-16863   |
| C4853767 | 354 | 1-354   | NC_012119.1 | 773279 | 243484-243841 |
| C4863379 | 379 | 109-379 | NC_012116.1 | 476890 | 367985-368264 |
| C4863379 | 379 | 109-213 | NC_016743.2 | 380861 | 145467-145579 |
| C4867095 | 390 | 40-258  | NC_012116.1 | 476890 | 2428-2642     |
| C4867095 | 390 | 40-388  | NC_012119.1 | 773279 | 694266-694618 |
| C4874563 | 412 | 101-412 | NC_012119.1 | 773279 | 380447-380757 |
| C4876719 | 419 | 21-161  | NC_001284.2 | 366924 | 106592-106733 |
| C4876719 | 419 | 4-161   | NC_012116.1 | 476890 | 248179-248337 |
| C4876719 | 419 | 23-419  | NC_012119.1 | 773279 | 539479-539983 |
| C4882289 | 438 | 14-438  | NC_001284.2 | 366924 | 288316-288741 |
| C4882289 | 438 | 1-438   | NC_012116.1 | 476890 | 133179-133621 |
| C4882289 | 438 | 1-438   | NC_012119.1 | 773279 | 452864-453316 |
| C4882289 | 438 | 1-438   | NC_016743.2 | 380861 | 3393-3837     |
| C4890891 | 471 | 6-471   | NC_012119.1 | 773279 | 699722-700185 |
| C4892379 | 478 | 1-478   | NC_001284.2 | 366924 | 190367-190847 |

|          |     |        |             |        |               |
|----------|-----|--------|-------------|--------|---------------|
| C4892379 | 478 | 1-478  | NC_012116.1 | 476890 | 322829-323296 |
| C4892379 | 478 | 1-478  | NC_012119.1 | 773279 | 772737-773211 |
| C4892379 | 478 | 1-478  | NC_016743.2 | 380861 | 93591-94062   |
| C4912341 | 577 | 2-577  | NC_001284.2 | 366924 | 132927-133505 |
| C4912341 | 577 | 1-577  | NC_012116.1 | 476890 | 163558-164132 |
| C4912341 | 577 | 1-577  | NC_012119.1 | 773279 | 77863-78433   |
| C4912341 | 577 | 29-577 | NC_016743.2 | 380861 | 25813-26359   |
| C4925047 | 659 | 1-659  | NC_001284.2 | 366924 | 135775-136428 |
| C4925047 | 659 | 1-659  | NC_012116.1 | 476890 | 160485-161137 |
| C4925047 | 659 | 1-659  | NC_012119.1 | 773279 | 74169-74822   |
| C4925047 | 659 | 1-659  | NC_016743.2 | 380861 | 28900-29553   |
| C4952039 | 911 | 1-911  | NC_001284.2 | 366924 | 166976-167883 |
| C4952039 | 911 | 7-911  | NC_012116.1 | 476890 | 348219-349128 |
| C4952039 | 911 | 1-911  | NC_012119.1 | 773279 | 761744-762664 |
| C4952039 | 911 | 1-911  | NC_016743.2 | 380861 | 131549-132470 |

**Supplementary Table S5. Statistics of repeats in *P. mume* genome.**

| Type         | Repeat Size (Mb) | % of genome  |
|--------------|------------------|--------------|
| Proteinmask  | 17.32            | 7.29         |
| Repeatmasker | 12.36            | 5.20         |
| Trf          | 10.58            | 4.45         |
| Denovo       | 103.15           | 43.41        |
| <b>Total</b> | <b>106.75</b>    | <b>44.92</b> |

**Supplementary Table S6. Occurrence of transposable elements in sequenced Rosaceae genomes.**

| Classification  | <i>Prunus mume</i>       |                 |                           |
|-----------------|--------------------------|-----------------|---------------------------|
|                 | Total length (Mb)        | TE coverage (%) | Total genome coverage (%) |
| LTR/Copia       | 23.8                     | 22.8            | 10.0                      |
| LTR/Gypsy       | 20.4                     | 19.5            | 8.6                       |
| LTR/Other       | 21.8                     | 20.8            | 9.2                       |
| LINE            | 3.1                      | 3.0             | 1.3                       |
| SINE            | 0.9                      | 0.9             | 0.4                       |
| DNA transposons | 20.2                     | 19.3            | 8.5                       |
| Other           | 1.1                      | 1.1             | 0.5                       |
| Unknown         | 13.3                     | 12.7            | 5.6                       |
| <b>Total</b>    | <b>104.6</b>             | <b>100.0</b>    | <b>44.1</b>               |
| Classification  | <i>Malus × domestica</i> |                 |                           |

|                    | Total length<br>(Mb) | TE coverage<br>(%) | Total genome coverage<br>(%) |
|--------------------|----------------------|--------------------|------------------------------|
| LTR/Copia          | 40.6                 | 12.9               | 5.5                          |
| LTR/Gypsy          | 187.1                | 59.5               | 25.2                         |
| LTR/Other          | 3.2                  | 1.0                | 0.4                          |
| LINE               | 48.1                 | 15.3               | 6.5                          |
| SINE               | -                    | -                  | -                            |
| DNA<br>transposons | 6.6                  | 2.1                | 0.9                          |
| Other              | -                    | -                  | -                            |
| Unknown            | 28.9                 | 9.2                | 3.9                          |
| <b>Total</b>       | <b>314.5</b>         | <b>100.0</b>       | <b>42.4</b>                  |

  

| <i>Fragaria vesca</i> |                      |                    |                              |
|-----------------------|----------------------|--------------------|------------------------------|
| Classification        | Total length<br>(Mb) | TE coverage<br>(%) | Total genome coverage<br>(%) |
| LTR/Copia             | 10.8                 | 22.5               | 5.3                          |
| LTR/Gypsy             | 12.9                 | 26.8               | 6.4                          |
| LTR/Other             | 8.5                  | 17.7               | 4.2                          |
| LINE                  | 0.7                  | 1.5                | 0.3                          |
| SINE                  | 0.2                  | 0.4                | 0.1                          |
| DNA<br>transposons    | 12.9                 | 26.8               | 6.4                          |
| Other                 | 2.1                  | 4.4                | 1.0                          |
| Unknown               | -                    | -                  | -                            |
| <b>Total</b>          | <b>48.1</b>          | <b>100.0</b>       | <b>23.8</b>                  |

Supplementary Table S7. List of tissues and reads for whole transcriptome sequencing mapped to *P. mume* genome.

| issue<br>name | Perfect<br>match<br>Read NO. | <=5bp<br>Mismatch<br>Read NO. | Unique<br>Match<br>Read NO. | Multi-position<br>Match Read<br>NO. | Total<br>Mapped<br>Reads<br>NO. | Total<br>Unmapped<br>Reads NO. | Total<br>Reads<br>NO. | Total<br>BasePairs<br>(bp) |
|---------------|------------------------------|-------------------------------|-----------------------------|-------------------------------------|---------------------------------|--------------------------------|-----------------------|----------------------------|
| Bud           | 12,499,437                   | 3,475,572                     | 15,405,362                  | 569,647                             | 15,975,009                      | 3,523,231                      | 19,498,240            | 1,754,841,60               |
| Fruit         | 17,705,866                   | 5,789,365                     | 22,404,254                  | 1,090,977                           | 23,495,231                      | 5,338,431                      | 28,833,662            | 2,595,029,58               |
| Leaf          | 16,237,146                   | 5,187,087                     | 20,469,481                  | 954,752                             | 21,424,233                      | 4,509,397                      | 25,933,630            | 2,334,026,70               |
| Root          | 18,373,940                   | 6,326,385                     | 23,528,150                  | 1,172,175                           | 24,700,325                      | 6,638,567                      | 31,338,892            | 2,820,500,28               |
| Stem          | 12,146,280                   | 4,286,634                     | 15,783,948                  | 648,966                             | 16,432,914                      | 3,828,296                      | 20,261,210            | 1,823,508,90               |

Supplementary Table S8. General statistics of predicted protein-coding gene.

| Gene set | Number | Average<br>length of | Average<br>length of | #Exons<br>per | Average<br>length of | Average<br>length of |
|----------|--------|----------------------|----------------------|---------------|----------------------|----------------------|
|----------|--------|----------------------|----------------------|---------------|----------------------|----------------------|

|                                    |                                 |        | transcribed<br>region(bp) | CDS(bp) | gene | exon(bp) | intron(bp) |
|------------------------------------|---------------------------------|--------|---------------------------|---------|------|----------|------------|
| <b>EST</b>                         |                                 | 4,699  | 2,001                     | 562     | 3.1  | 184      | 701        |
| <b>Protein<br/>homology search</b> | <i>Cucumis sativus</i>          | 24,277 | 2,533                     | 1,053   | 4.2  | 253      | 469        |
|                                    | <i>Carica papaya</i>            | 27,200 | 2,022                     | 913     | 3.7  | 247      | 411        |
|                                    | <i>Fragaria vesca</i>           | 29,586 | 2642                      | 1043    | 4.0  | 257      | 521        |
|                                    | <i>Arabidopsis<br/>thaliana</i> | 25,414 | 2412                      | 1008    | 4.2  | 241      | 441        |
|                                    | <b>Augustus</b>                 | 32,479 | 2,442                     | 1,175   | 5.1  | 229      | 307        |
| <b>Gene finder<br/>software</b>    | <b>Genscan</b>                  | 28,610 | 5,211                     | 1,315   | 6.0  | 217      | 772        |
|                                    | <b>GlimmerHMM</b>               | 36,095 | 2,032                     | 964     | 3.9  | 245      | 364        |
| <b>GLEAN</b>                       |                                 | 30,012 | 2,523                     | 1,164   | 4.7  | 249      | 369        |
| <b>RNA-Seq</b>                     |                                 | 21,585 | 2,454                     | 1,074   | 4.4  | 245      | 409        |
| <b>Combine</b>                     |                                 | 31,390 | 2,514                     | 1,146   | 4.6  | 249      | 380        |

**Supplementary Table S9. Functional annotation of predicted genes with homology or functional classification by each method.**

|                    | Database         | Number  | Percent |
|--------------------|------------------|---------|---------|
| <b>Annotated</b>   | <b>Swissprot</b> | 19,696  | 62.8%   |
|                    | <b>InterPro</b>  | 21,236  | 67.7%   |
|                    | <b>GO</b>        | 16,822  | 53.6%   |
|                    | <b>KEGG</b>      | 15,504  | 49.4%   |
|                    | <b>Trembl</b>    | 25,650  | 81.7%   |
|                    | <b>Total</b>     | 25,905* | 82.5%   |
| <b>Unannotated</b> |                  | 5,485   | 17.5%   |
| <b>Total</b>       |                  | 31,390  | 100%    |

\*449 annotations were hits to hypothetical or uncharacterized proteins.

**Supplementary Table S10. Non-coding RNA gene fragment in the *P. mume* current assembly.**

| ncRNA Type   | Copy #     | Average length (bp) | Total length (bp) | % of genome   |
|--------------|------------|---------------------|-------------------|---------------|
| <b>miRNA</b> | <b>209</b> | <b>120.65</b>       | <b>25,216</b>     | <b>0.0106</b> |
| <b>tRNA</b>  | <b>508</b> | <b>75.21</b>        | <b>38,209</b>     | <b>0.0012</b> |
| <b>rRNA</b>  | <b>125</b> | <b>196.89</b>       | <b>24,611</b>     | <b>0.0103</b> |
| 28S          | 46         | 348.98              | 16,053            | 0.0067        |
| 18S          | 17         | 111.29              | 1,892             | 0.0008        |
| 5.8S         | 11         | 112.55              | 1,238             | 0.0005        |
| 5S           | 51         | 106.43              | 5,428             | 0.0022        |
| <b>snRNA</b> | <b>287</b> | <b>118.09</b>       | <b>33,891</b>     | <b>0.0142</b> |
| CD-box       | 158        | 98.08               | 15,497            | 0.0065        |
| HACA-box     | 21         | 118.14              | 2,481             | 0.001         |

slicing

108

147.34

15,913

0.0067

---



**Supplementary Table S11. *P. mume* genome duplication.**

The table illustrates seven ancestral duplication indentified in the *P. mume* genome.

|                      | Block1     |          |          | Block2     |          |          | Block3     |          |          | Block4     |          |          | Block5     |        |         |
|----------------------|------------|----------|----------|------------|----------|----------|------------|----------|----------|------------|----------|----------|------------|--------|---------|
|                      | chromosome | start    | end      | chromosome | start  | end     |
| <b>duplication 1</b> | P5         | 16265858 | 18183500 | P5         | 23396664 | 26040513 | P7         | 8125911  | 11547528 |            |          |          |            |        |         |
| <b>duplication 2</b> | P2         | 6808229  | 12371974 | P2         | 35608738 | 36935435 | P4         | 1766505  | 5752689  | P8         | 12986087 | 16789085 |            |        |         |
| <b>duplication 3</b> | P1         | 23177695 | 25259385 | P2         | 31409881 | 33475726 | P2         | 38602466 | 40436626 | P4         | 292282   | 368157   | P6         | 286439 | 3891187 |
| <b>duplication 4</b> | P1         | 1619214  | 5490413  | P1         | 20095602 | 22197305 | P5         | 19956308 | 21313562 |            |          |          |            |        |         |
| <b>duplication 5</b> | P2         | 13028574 | 15933192 | P6         | 5999005  | 11947609 | P8         | 11039556 | 11238045 |            |          |          |            |        |         |
| <b>duplication 6</b> | P2         | 16423771 | 21952301 | P4         | 19149991 | 23269642 | P7         | 11799733 | 15655140 |            |          |          |            |        |         |
| <b>duplication 7</b> | P3         | 515390   | 3556846  | P4         | 8365819  | 8496193  | P4         | 17401251 | 17775106 |            |          |          |            |        |         |

**Supplementary Table S12. The synteny between *P. mume*, *F. vesca* and *M. × domestica*.**

The number of orthologous genes per chromosome is shown in parenthesis.

a) Synteny between *P. mume* and *M. × domestica*.

| <i>Prunus mume</i><br>chromosome | <i>Malus × domestica</i> chromosome                                                                             |
|----------------------------------|-----------------------------------------------------------------------------------------------------------------|
| P1(579)                          | M1(11)-M2(15)-M3(136)-M4(107)-M10(5)-M11(137)-M12(125)-M13(7)-M15(36)                                           |
| P2(998)                          | M1(27)-M2(10)-M3(5)-M4(30)-M5(10)-M7(8)-M8(155)-M9(68)-M10(30)-M11(5)-M12(52)-M13(244)-M14(6)-M15(197)-M16(151) |
| P3(502)                          | M2(5)-M3(73)-M5(136)-M10(177)-M11(84)-M15(27)                                                                   |
| P4(583)                          | M5(11)-M6(32)-M8(20)-M9(261)-M13(47)-M17(212)                                                                   |
| P5(568)                          | M1(174)-M2(116)-M4(22)-M5(5)-M7(188)-M8(17)-M10(5)-M12(9)-M14(11)-M15(21)                                       |
| P6(432)                          | M3(28)-M4(7)-M5(117)-M6(15)-M7(8)-M8(21)-M9(12)-M10(120)-M11(39)-M12(17)-M14(12)-M15(36)                        |
| P7(443)                          | M1(11)-M2(12)-M4(35)-M6(236)-M7(13)-M9(9)-M10(6)-M14(109)-M15(12)                                               |
| P8(441)                          | M2(133)-M5(7)-M9(11)-M12(57)-M13(6)-M14(79)-M15(148)                                                            |

b) Synteny between *F. vesca* and *M. × domestica*.

| <i>Fragaria vesca</i><br>chromosome | <i>Malus × domestica</i> chromosome                                                  |
|-------------------------------------|--------------------------------------------------------------------------------------|
| F1(211)                             | M2(64)-M5(5)-M9(29)-M11(9)-M15(83)-M17(21)                                           |
| F2(377)                             | M1(6)-M3(34)-M5(53)-M6(6)-M8(72)-M10(47)-M11(24)-M12(43)-M15(92)                     |
| F3(339)                             | M3(81)-M5(79)-M9(10)-M10(87)-M11(63)-M13(7)-M15(7)-M16(5)                            |
| F4(169)                             | M9(26)-M13(88)-M15(13)-M16(42)                                                       |
| F5(282)                             | M1(5)-M2(9)-M3(5)-M4(22)-M6(106)-M8(10)-M9(10)-M10(8)-M11(9)-M13(11)-M14(64)-M15(23) |
| F6(384)                             | M1(6)-M4(53)-M6(14)-M8(18)-M9(71)-M12(96)-M13(6)-M14(40)-M15(9)-M17(71)              |
| F7(269)                             | M1(112)-M2(24)-M4(10)-M5(15)-M7(92)-M8(5)-M15(11)                                    |

Supplementary Table S13. DAM gene orthologs in *P. mume*.

| Gene name | Query species         | ID            | <i>P. mume</i> gene prediction |          |
|-----------|-----------------------|---------------|--------------------------------|----------|
|           |                       |               | Scaffold                       | Genemark |
| PmDAM1    | <i>Prunus persica</i> | gb DQ863253.2 | scaffold94                     | Pm004420 |
| PmDAM2    | <i>Prunus persica</i> | gb DQ863255.1 | scaffold94                     | Pm004419 |
| PmDAM3    | <i>Prunus persica</i> | gb DQ863256.1 | scaffold94                     | Pm004418 |
| PmDAM4    | <i>Prunus persica</i> | gb DQ863250.1 | scaffold94                     | Pm004417 |
| PmDAM5    | <i>Prunus persica</i> | gb DQ863251.1 | scaffold94                     | Pm004416 |
| PmDAM6    | <i>Prunus persica</i> | gb AB437345.1 | scaffold94                     | Pm004415 |

Supplementary Table S14. CBF orthologs in *Prunus mume* *Malus × domestica* *Fragaria vesca* *Populus trichocarpa* *Vitis vinifera* *Orazy sativa* and *Arabidopsis thaliana*.

| Species                    | Number | Accession number                                                                                                                                                                                                                                                                       |
|----------------------------|--------|----------------------------------------------------------------------------------------------------------------------------------------------------------------------------------------------------------------------------------------------------------------------------------------|
| <i>Prunus mume</i>         | 13     | Pm004870, Pm019385, Pm019386, Pm026227, Pm023766, Pm023767, Pm023768, Pm023769, Pm023770, Pm023772, Pm023775, Pm023777, Pm026221                                                                                                                                                       |
| <i>Malus × domestica</i>   | 10     | MDP0000154764, MDP0000155057, MDP0000189347, MDP0000195376, MDP0000198054, MDP0000262710, MDP0000400129, MDP0000451365, MDP0000652413, MDP0000833641                                                                                                                                   |
| <i>Fragaria vesca</i>      | 6      | mrna13327.1, mrna13329.1, mrna30159.1, mrna30226.1, mrna32378.1, mrna32380.1                                                                                                                                                                                                           |
| <i>Populus trichocarpa</i> | 14     | POPTR_0001s08710.1, POPTR_0001s08720.1, POPTR_0001s08740.1, POPTR_0003s12120.1, POPTR_0004s19820.1, POPTR_0006s02180.1, POPTR_0009s14990.1, POPTR_0012s13870.1, POPTR_0012s13880.1, POPTR_0013s10330.1, POPTR_0015s13830.1, POPTR_0015s13840.1, POPTR_0016s02010.1, POPTR_0019s10420.1 |
| <i>Orazy sativa</i>        | 11     | Os01t0968800-00, Os02t0558700-00, Os02t0676800-01, Os02t0677300-01, Os03t0117900-01, Os04t0572400-00, Os08t0545500-00, Os09t0522000-01, Os09t0522100-00,                                                                                                                               |

|                             |    |                                                                                                                                  |
|-----------------------------|----|----------------------------------------------------------------------------------------------------------------------------------|
|                             |    | Os09t0522200-02, Os11t0242300-00                                                                                                 |
| <i>Vitis vinifera</i>       | 5  | GSVIVT01019860001, GSVIVT01031387001, GSVIVT01031388001, GSVIVT01033793001, GSVIVT01033795001                                    |
| <i>Arabidopsis thaliana</i> | 10 | AT1G12610.1, AT1G12630.1, AT1G63030.1, AT2G35700.1, AT2G36450.1, AT4G25470.1, AT4G25480.1, AT4G25490.1, AT5G51990.1, AT5G52020.1 |

**Supplementary Table S15. Dehydrin orthologs in *Prunus mume* *Malus* × *domestica* *Fragaria vesca* *Populus trichocarpa* *Vitis vinifera* *Orazy sativa* and *Arabidopsis thaliana*.**

| Species                         | Number | Accession number                                                                                                                                                                                                                                              |
|---------------------------------|--------|---------------------------------------------------------------------------------------------------------------------------------------------------------------------------------------------------------------------------------------------------------------|
| <i>Prunus mume</i>              | 7      | Pm000687, Pm026682, Pm026683, Pm026684, Pm020945, Pm021811, Pm006114                                                                                                                                                                                          |
| <i>Malus</i> × <i>domestica</i> | 17     | MDP0000126135, MDP0000129775, MDP0000178973, MDP0000196703, MDP0000265874, MDP0000269995, MDP0000360414, MDP0000529003, MDP0000595270, MDP0000595271, MDP0000629961, MDP0000689622, MDP0000698024, MDP0000770493, MDP0000862169, MDP0000868044, MDP0000868045 |
| <i>Fragaria vesca</i>           | 7      | mrna14934.1, mrna14935.1, mrna14938.1, mrna14940.1, mrna17179.1, mrna21840.1, mrna27549.1                                                                                                                                                                     |
| <i>Populus trichocarpa</i>      | 8      | POPTR_0002s01460.1, POPTR_0003s13850.1, POPTR_0004s16590.1, POPTR_0005s26930.1, POPTR_0009s12290.1, POPTR_0013s05870.1, POPTR_0013s05880.1, POPTR_0013s05890.1                                                                                                |
| <i>Orazy sativa</i>             | 7      | Os01t0702500-01, Os02t0669100-01, Os11t0451700-00, Os11t0453900-01, Os11t0454000-01, Os11t0454200-01, Os11t0454300-01                                                                                                                                         |
| <i>Vitis vinifera</i>           | 3      | GSVIVT01018878001, GSVIVT01019440001, GSVIVT01023824001                                                                                                                                                                                                       |
| <i>Arabidopsis thaliana</i>     | 10     | AT1G20440.1, AT1G20450.1, AT1G54410.1, AT1G76180.2, AT2G21490.1, AT3G50970.1, AT3G50980.1, AT4G38410.1, AT4G39130.1, AT5G66400.1                                                                                                                              |

**Supplementary Table S16. Number of LRR-RLK orthologous genes in each of 19 subfamilies in *Arabidopsis thaliana* (At)<sup>30</sup> *Prunus mume* (Pm) *Theobroma cacao* (Tc)<sup>31</sup> and *Populus trichocarpa* (Pt)<sup>32</sup>.**

Number of LRR-RLK for *Arabidopsis*, *cacao* and *populus* were obtained by

published.

| Subfamily         | At      | Pm  | Tc      | Pt  |
|-------------------|---------|-----|---------|-----|
| <b>LRR-I</b>      | 44      | 15  | 12      | 19  |
| <b>LRR-II</b>     | 14      | 10  | 10      | 20  |
| <b>LRR-III</b>    | 46      | 33  | 37      | 63  |
| <b>LRR-IV</b>     | 3       | 4   | 3       | 8   |
| <b>LRR-V</b>      | 9       | 6   | 6       | 11  |
| <b>LRR-VI-1</b>   | 5       | 1   | 5       | 7   |
| <b>LRR-VI-2</b>   | 5       | 4   | 4       | 10  |
| <b>LRR-VII</b>    | 8       | 5   | 6       | 12  |
| <b>LRR-VIII-1</b> | 8       | 6   | 7       | 15  |
| <b>LRR-VIII-2</b> | 12      | 16  | 19      | 50  |
| <b>LRR-IX</b>     | 4       | 6   | 5       | 12  |
| <b>LRR-Xa</b>     | 7       | 4   | 7       | 25  |
| <b>LRR-Xb</b>     | 6       | 4   | 5       | 22  |
| <b>LRR-XI</b>     | 32      | 69  | 54      | 54  |
| <b>LRR-XII</b>    | 8       | 57  | 63      | 90  |
| <b>LRR-XIIIa</b>  | 3       | 2   | 2       | 4   |
| <b>LRR-XIIIb</b>  | 3       | 5   | 2       | 4   |
| <b>LRR-XIV</b>    | 2       | 4   | 2       | 6   |
| <b>LRR-XV</b>     | 2       | 2   | 4       | 4   |
| <b>Total</b>      | 22<br>1 | 253 | 25<br>3 | 436 |

**Supplementary Table S17. Classification of *Prunus mume* orthologous genes into one of the 19 LRR-RLK subfamilies.**

One representative member of *Arabidopsis thaliana* gene<sup>1</sup> is cited per subfamily.

| LRR-RLK subfamily | <i>Arabidopsis</i> representatives | <i>Prunus mume</i> accession number                                                                                                                             |
|-------------------|------------------------------------|-----------------------------------------------------------------------------------------------------------------------------------------------------------------|
| <b>LRR-I</b>      | AT3G46340                          | Pm002277, Pm002496, Pm006835, Pm030882, Pm014878, Pm014880, Pm014877, Pm013384, Pm014948, Pm027271, Pm005248, Pm005247, Pm030876, Pm030875, Pm020353            |
| <b>LRR-II</b>     | AT4G30520                          | Pm010269, Pm006714, Pm008622, Pm030503, Pm015448, Pm002018, Pm012811, Pm028571, Pm004091, Pm004096                                                              |
| <b>LRR-III</b>    | AT3G50230                          | Pm020518, Pm010525, Pm001659, Pm025824, Pm006945, Pm014441, Pm021207, Pm002471, Pm005511, Pm002489, Pm005979, Pm012009, Pm024697, Pm015746, Pm022076, Pm025296, |

|                   |           |                                                                                                                                                                                                                                                                                                                                                                                                                                                                                                                                                                                                                                                                                                                  |
|-------------------|-----------|------------------------------------------------------------------------------------------------------------------------------------------------------------------------------------------------------------------------------------------------------------------------------------------------------------------------------------------------------------------------------------------------------------------------------------------------------------------------------------------------------------------------------------------------------------------------------------------------------------------------------------------------------------------------------------------------------------------|
|                   |           | Pm013116, Pm008955, Pm005073, Pm027108, Pm013229, Pm019273, Pm000229, Pm003002, Pm019796, Pm024098, Pm027464, Pm013022, Pm025056, Pm026264, Pm029276, Pm018996, Pm020411                                                                                                                                                                                                                                                                                                                                                                                                                                                                                                                                         |
| <b>LRR-IV</b>     | AT5G51560 | Pm005164, Pm017897, Pm019456, Pm023607                                                                                                                                                                                                                                                                                                                                                                                                                                                                                                                                                                                                                                                                           |
| <b>LRR-V</b>      | AT2G20850 | Pm013128, Pm013147, Pm009700, Pm015360, Pm009945, Pm025987                                                                                                                                                                                                                                                                                                                                                                                                                                                                                                                                                                                                                                                       |
| <b>LRR-VI-1</b>   | AT1G14390 | Pm006551                                                                                                                                                                                                                                                                                                                                                                                                                                                                                                                                                                                                                                                                                                         |
| <b>LRR-VI-2</b>   | AT4G18640 | Pm000615, Pm018968, Pm010238, Pm023844                                                                                                                                                                                                                                                                                                                                                                                                                                                                                                                                                                                                                                                                           |
| <b>LRR-VII</b>    | AT3G56370 | Pm030375, Pm003027, Pm019069, Pm019064, Pm023650                                                                                                                                                                                                                                                                                                                                                                                                                                                                                                                                                                                                                                                                 |
| <b>LRR-VIII-1</b> | AT5G37450 | Pm011992, Pm011995, Pm003282, Pm002989, Pm002993, Pm000224                                                                                                                                                                                                                                                                                                                                                                                                                                                                                                                                                                                                                                                       |
| <b>LRR-VIII-2</b> | AT3G14840 | Pm001341, Pm010353, Pm010355, Pm028315, Pm010187, Pm028318, Pm010184, Pm010180, Pm010179, Pm011281, Pm011285, Pm014548, Pm010657, Pm010650, Pm010658, Pm011051                                                                                                                                                                                                                                                                                                                                                                                                                                                                                                                                                   |
| <b>LRR-IX</b>     | AT2G01820 | Pm005900, Pm029428, Pm007732, Pm007731, Pm026018, Pm001495                                                                                                                                                                                                                                                                                                                                                                                                                                                                                                                                                                                                                                                       |
| <b>LRR-Xa</b>     | AT1G27190 | Pm005975, Pm011379, Pm013142, Pm006360                                                                                                                                                                                                                                                                                                                                                                                                                                                                                                                                                                                                                                                                           |
| <b>LRR-Xb</b>     | AT2G01950 | Pm000305, Pm001806, Pm005928, Pm019358                                                                                                                                                                                                                                                                                                                                                                                                                                                                                                                                                                                                                                                                           |
| <b>LRR-XI</b>     | AT4G26540 | Pm004853, Pm004852, Pm028682, Pm019206, Pm012165, Pm001768, Pm022261, Pm021906, Pm030632, Pm014378, Pm019175, Pm004847, Pm004850, Pm007681, Pm004845, Pm004842, Pm025699, Pm004844, Pm004843, Pm004830, Pm004851, Pm014573, Pm014578, Pm010946, Pm030749, Pm016991, Pm010950, Pm030977, Pm020519, Pm020526, Pm020522, Pm020527, Pm020524, Pm020528, Pm020516, Pm020529, Pm019513, Pm020500, Pm003616, Pm022449, Pm008982, Pm020415, Pm022645, Pm000370, Pm028523, Pm010866, Pm003897, Pm002307, Pm001886, Pm022247, Pm025902, Pm003639, Pm009002, Pm011209, Pm021842, Pm004312, Pm021005, Pm004310, Pm004128, Pm002311, Pm027308, Pm027305, Pm027300, Pm027299, Pm005185, Pm010102, Pm025840, Pm014536, Pm014534 |
| <b>LRR-XII</b>    | AT5G20480 | Pm003344, Pm003343, Pm013839, Pm027761, Pm010264, Pm016619, Pm010252, Pm025421, Pm010256, Pm010251, Pm010267, Pm011739, Pm016763, Pm010244, Pm010253, Pm021185,                                                                                                                                                                                                                                                                                                                                                                                                                                                                                                                                                  |

|                     |           |                                                                                                                                                                                                                                                                                                                                                                                                                          |
|---------------------|-----------|--------------------------------------------------------------------------------------------------------------------------------------------------------------------------------------------------------------------------------------------------------------------------------------------------------------------------------------------------------------------------------------------------------------------------|
|                     |           | Pm010415, Pm010152, Pm010248, Pm030041, Pm010285, Pm008893, Pm002944, Pm029313, Pm025787, Pm002949, Pm002952, Pm002947, Pm007467, Pm002772, Pm002785, Pm002780, Pm022102, Pm002788, Pm002778, Pm002771, Pm000729, Pm021259, Pm000909, Pm000728, Pm000911, Pm000906, Pm000727, Pm000730, Pm019477, Pm005051, Pm018903, Pm017542, Pm017541, Pm017540, Pm017543, Pm017537, Pm018902, Pm002943, Pm005356, Pm005351, Pm010287 |
| <b>LRR-XIIIa</b>    | AT2G35620 | Pm023020, Pm024820                                                                                                                                                                                                                                                                                                                                                                                                       |
| <b>LRR-XIIIb</b>    | AT5G62230 | Pm010851, Pm019437, Pm005587, Pm024396, Pm009223                                                                                                                                                                                                                                                                                                                                                                         |
| <b>LRR-XIV</b>      | AT2G16250 | Pm027637, Pm010611, Pm021756, Pm005823                                                                                                                                                                                                                                                                                                                                                                                   |
| <b>LRR-XV</b>       | AT3G02130 | Pm016030, Pm030619                                                                                                                                                                                                                                                                                                                                                                                                       |
| <b>Unclassified</b> |           | Pm008908, Pm016875, Pm028633, Pm024484, Pm016188, Pm006257, Pm026733, Pm027728, Pm010257, Pm024843                                                                                                                                                                                                                                                                                                                       |

**Supplementary Table S18. Numbers of orthologous genes found in *Prunus mume* (Pm) *Malus × domestica* (Md) *Populus trichocarpa* (Pt) *Arabidopsis thaliana* (At) *Vitis vinifera* (Vv) and *Fragaria vesca* (Fv) that encode NBS domains similar to those in plant R proteins.**

(NBS data for *M. × domestica*, *A. thaliana*, *P. trichocarpa* and *V. vinifera* were obtained by published: Md: The genome of the domesticated apple (*Malus x domestica* Borkh.) Pt: Genome-wide identification of NBS resistance genes in *Populus Trichocarpa* At: Genome-wide analysis of NBS-LRR-encoding genes in *Arabidopsis* Vv: A high quality draft consensus sequence of the genome of a heterozygous grapevine variety.)

| <b>Type gene</b>             | <b>Pm</b> | <b>Md</b> | <b>Pt</b> | <b>At</b> | <b>Vv</b> | <b>Fv</b> |
|------------------------------|-----------|-----------|-----------|-----------|-----------|-----------|
| <b>TIR-NBS-LRR</b>           | 151       | 224       | 78        | 93        | 97        | 22        |
| <b>TIR-NBS</b>               | 28        | 20        | 10        | 21        | 14        | 8         |
| <b>CC-NBS-LRR</b>            | 30        | 181       | 120       | 51        | 203       | 37        |
| <b>CC-NBS</b>                | 5         | 26        | 14        | 5         | 26        | 9         |
| <b>CC-TIR-NBS</b>            | 0         | 5         | -         | -         | -         | -         |
| <b>CC-TIR-NBS-LRR</b>        | 2         | 18        | -         | -         | -         | 1         |
| <b>NBS-LRR</b>               | 148       | 394       | 132       | 3         | 159       | 70        |
| <b>NBS</b>                   | 47        | 104       | 62        | 1         | 36        | 31        |
| <b>Total NBS with LRR</b>    | 331       | 817       | 330       | 147       | 459       | 130       |
| <b>Total NBS without LRR</b> | 80        | 155       | 86        | 27        | 76        | 48        |
| <b>Total</b>                 | 411       | 972       | 416       | 174       | 535       | 178       |

**Supplementary Table S19. Numbers of orthologous genes found in *Prunus mume* (Pm) *Malus × domestica* (Md) *Populus trichocarpa* (Pt) *Arabidopsis thaliana* (At) *Vitis vinifera* (Vv) *Fragaria vesca* (Fv) and *Oryza sativa* (Os) that encode pathogenesis-related proteins in plant .**

| Type         | Pm  | Md  | Pt  | At  | Vv  | Fv  | Os  |
|--------------|-----|-----|-----|-----|-----|-----|-----|
| <b>Pr1</b>   | 17  | 15  | 18  | 22  | 11  | 16  | 34  |
| <b>Pr2</b>   | 47  | 74  | 70  | 49  | 31  | 44  | 58  |
| <b>Pr3</b>   | 12  | 15  | 21  | 14  | 7   | 9   | 14  |
| <b>Pr5</b>   | 29  | 48  | 44  | 22  | 17  | 29  | 23  |
| <b>Pr6</b>   | 2   | 4   | 4   | 2   | 2   | 1   | 1   |
| <b>Pr7</b>   | 52  | 79  | 70  | 52  | 64  | 42  | 40  |
| <b>Pr8</b>   | 6   | 21  | 13  | 1   | 10  | 7   | 25  |
| <b>Pr10</b>  | 25  | 48  | 25  | 1   | 12  | 21  | 1   |
| <b>Total</b> | 190 | 304 | 265 | 163 | 154 | 169 | 196 |

**Supplementary Table S20. Pathogen related genes identified in *P. mume* genome.**

| Gene name   | Query species               | ID               | <i>P. mume</i> gene prediction |          |
|-------------|-----------------------------|------------------|--------------------------------|----------|
|             |                             |                  | Scaffold                       | Genemark |
| <b>Pr1</b>  | <i>Arabidopsis thaliana</i> | TAIR AT2G14610.1 | scaffold694                    | Pm021063 |
|             |                             |                  | scaffold694                    | Pm021062 |
|             |                             |                  | scaffold694                    | Pm021061 |
|             |                             |                  | scaffold694                    | Pm021060 |
|             |                             |                  | scaffold694                    | Pm021059 |
|             |                             |                  | scaffold694                    | Pm021058 |
|             |                             |                  | scaffold694                    | Pm021055 |
|             |                             |                  | scaffold269                    | Pm010664 |
|             |                             |                  | scaffold68                     | Pm002330 |
|             |                             |                  | scaffold144                    | Pm026541 |
|             |                             |                  | scaffold144                    | Pm026666 |
|             |                             |                  | scaffold216                    | Pm020984 |
|             |                             |                  | scaffold216                    | Pm020985 |
|             |                             |                  | scaffold2458                   | Pm029379 |
|             |                             |                  | scaffold491                    | Pm008682 |
| scaffold491 | Pm008683                    |                  |                                |          |
| scaffold130 | Pm002812                    |                  |                                |          |
| <b>Pr2</b>  | <i>Fragaria ananassa</i>    | gb AY989819.1    | scaffold538                    | Pm007733 |
|             |                             |                  | scaffold236                    | Pm006688 |
|             |                             |                  | scaffold559                    | Pm001330 |
|             |                             |                  | scaffold841                    | Pm031195 |
|             |                             |                  | scaffold841                    | Pm031196 |

---

|              |          |
|--------------|----------|
| scaffold484  | Pm027058 |
| scaffold484  | Pm027057 |
| scaffold1057 | Pm028251 |
| scaffold1057 | Pm028252 |
| scaffold384  | Pm019219 |
| scaffold576  | Pm012164 |
| scaffold576  | Pm012166 |
| scaffold576  | Pm012168 |
| scaffold326  | Pm009666 |
| scaffold272  | Pm029662 |
| scaffold548  | Pm018808 |
| scaffold55   | Pm006322 |
| scaffold10   | Pm015150 |
| scaffold535  | Pm027288 |
| scaffold170  | Pm000889 |
| scaffold217  | Pm011905 |
| scaffold442  | Pm013018 |
| scaffold246  | Pm001815 |
| scaffold373  | Pm026985 |
| scaffold144  | Pm026504 |
| scaffold181  | Pm008313 |
| scaffold2226 | Pm029335 |
| scaffold349  | Pm010418 |
| scaffold281  | Pm005809 |
| scaffold528  | Pm000021 |
| scaffold175  | Pm025784 |
| scaffold175  | Pm025785 |
| scaffold175  | Pm025782 |
| scaffold61   | Pm019057 |
| scaffold15   | Pm000196 |
| scaffold148  | Pm022936 |
| scaffold1094 | Pm028290 |
| scaffold151  | Pm021740 |
| scaffold668  | Pm027374 |
| scaffold461  | Pm009548 |
| scaffold572  | Pm013667 |
| scaffold441  | Pm016681 |
| scaffold443  | Pm009644 |
| scaffold178  | Pm025354 |
| scaffold98   | Pm004932 |
| scaffold41   | Pm027564 |



|            |                          |               |              |          |
|------------|--------------------------|---------------|--------------|----------|
|            |                          |               | scaffold182  | Pm019717 |
|            |                          |               | scaffold307  | Pm008747 |
|            |                          |               | scaffold580  | Pm026843 |
|            |                          |               | scaffold181  | Pm008299 |
|            |                          |               | scaffold177  | Pm007648 |
|            |                          |               | scaffold134  | Pm007414 |
| <b>Pr3</b> | <i>Fragaria ananassa</i> | gb AF320111.1 | scaffold1287 | Pm028448 |
|            |                          |               | scaffold159  | Pm020963 |
|            |                          |               | scaffold549  | Pm012870 |
|            |                          |               | scaffold198  | Pm007477 |
|            |                          |               | scaffold198  | Pm007487 |
|            |                          |               | scaffold198  | Pm007488 |
|            |                          |               | scaffold198  | Pm007492 |
|            |                          |               | scaffold34   | Pm003991 |
|            |                          |               | scaffold521  | Pm014435 |
|            |                          |               | scaffold830  | Pm023785 |
|            |                          |               | scaffold144  | Pm026768 |
|            |                          |               | scaffold724  | Pm009145 |
|            |                          |               | scaffold281  | Pm005777 |
|            |                          |               | scaffold175  | Pm025781 |
|            |                          |               | scaffold175  | Pm025780 |
|            |                          |               | scaffold175  | Pm025779 |
|            |                          |               | scaffold175  | Pm025777 |
|            |                          |               | scaffold175  | Pm025775 |
|            |                          |               | scaffold175  | Pm025772 |
|            |                          |               | scaffold175  | Pm025769 |
| <b>Pr5</b> | <i>Malus × domestica</i> | gb DQ318213.1 | scaffold175  | Pm025739 |
|            |                          |               | scaffold175  | Pm025774 |
|            |                          |               | scaffold61   | Pm019088 |
|            |                          |               | scaffold125  | Pm015816 |
|            |                          |               | scaffold115  | Pm018833 |
|            |                          |               | scaffold159  | Pm020840 |
|            |                          |               | scaffold159  | Pm020839 |
|            |                          |               | scaffold264  | Pm023883 |
|            |                          |               | scaffold264  | Pm023884 |
|            |                          |               | scaffold264  | Pm023886 |
|            |                          |               | scaffold264  | Pm023887 |
|            |                          |               | scaffold130  | Pm002662 |
|            |                          |               | scaffold266  | Pm029535 |
|            |                          |               | scaffold139  | Pm006193 |
|            |                          |               | scaffold139  | Pm006194 |

|             |                                    |               |              |          |
|-------------|------------------------------------|---------------|--------------|----------|
|             |                                    |               | scaffold182  | Pm019646 |
| <b>Pr6</b>  | <i>Arabidopsis thaliana</i>        | gb AY065127.1 | scaffold1307 | Pm028462 |
|             |                                    |               | scaffold880  | Pm031238 |
| <b>Pr7</b>  | <i>Lycopersicon<br/>esculentum</i> | gb Y17276.1   | scaffold289  | Pm018093 |
|             |                                    |               | scaffold289  | Pm018094 |
|             |                                    |               | scaffold564  | Pm018682 |
|             |                                    |               | scaffold500  | Pm003658 |
|             |                                    |               | scaffold484  | Pm027094 |
|             |                                    |               | scaffold269  | Pm010634 |
|             |                                    |               | scaffold482  | Pm026205 |
|             |                                    |               | scaffold326  | Pm009702 |
|             |                                    |               | scaffold1175 | Pm028353 |
|             |                                    |               | scaffold2134 | Pm029257 |
|             |                                    |               | scaffold221  | Pm019423 |
|             |                                    |               | scaffold227  | Pm002421 |
|             |                                    |               | C5025277     | Pm024247 |
|             |                                    |               | scaffold230  | Pm000652 |
|             |                                    |               | scaffold230  | Pm000653 |
|             |                                    |               | scaffold373  | Pm026972 |
|             |                                    |               | scaffold250  | Pm000069 |
|             |                                    |               | scaffold108  | Pm021706 |
|             |                                    |               | scaffold897  | Pm031276 |
|             |                                    |               | scaffold199  | Pm001365 |
|             |                                    |               | scaffold357  | Pm026384 |
|             |                                    |               | scaffold101  | Pm020495 |
|             |                                    |               | scaffold61   | Pm018841 |
|             |                                    |               | scaffold61   | Pm018842 |
|             |                                    |               | scaffold1416 | Pm016596 |
|             |                                    |               | scaffold157  | Pm014928 |
|             |                                    |               | scaffold884  | Pm031249 |
|             |                                    |               | scaffold884  | Pm031251 |
|             |                                    |               | scaffold25   | Pm023747 |
|             |                                    |               | scaffold25   | Pm023746 |
|             |                                    |               | scaffold45   | Pm016775 |
|             |                                    |               | scaffold159  | Pm020848 |
|             |                                    |               | scaffold57   | Pm013171 |
| scaffold57  | Pm013240                           |               |              |          |
| scaffold341 | Pm005378                           |               |              |          |
| scaffold341 | Pm005377                           |               |              |          |
| scaffold341 | Pm005300                           |               |              |          |
| scaffold341 | Pm005299                           |               |              |          |
| scaffold341 | Pm005298                           |               |              |          |
| scaffold313 | Pm010336                           |               |              |          |
| scaffold443 | Pm009648                           |               |              |          |

|             |                          |               |             |          |
|-------------|--------------------------|---------------|-------------|----------|
|             |                          |               | scaffold473 | Pm008916 |
|             |                          |               | scaffold135 | Pm000397 |
|             |                          |               | scaffold135 | Pm000396 |
|             |                          |               | scaffold139 | Pm006167 |
|             |                          |               | scaffold139 | Pm006209 |
|             |                          |               | scaffold155 | Pm023689 |
|             |                          |               | scaffold155 | Pm023690 |
|             |                          |               | scaffold155 | Pm023691 |
|             |                          |               | scaffold155 | Pm023693 |
|             |                          |               | scaffold155 | Pm023694 |
|             |                          |               | scaffold155 | Pm023702 |
|             |                          |               | scaffold303 | Pm018434 |
|             |                          |               | scaffold133 | Pm018214 |
| <b>Pr8</b>  | <i>Malus × domestica</i> | gb DQ318214.1 | scaffold133 | Pm018201 |
|             |                          |               | scaffold133 | Pm018170 |
|             |                          |               | scaffold182 | Pm019804 |
|             |                          |               | scaffold182 | Pm019808 |
|             |                          |               | scaffold181 | Pm008249 |
|             |                          |               | scaffold181 | Pm008250 |
|             |                          |               | scaffold181 | Pm008251 |
|             |                          |               | scaffold181 | Pm008252 |
|             |                          |               | scaffold181 | Pm008253 |
|             |                          |               | scaffold181 | Pm008254 |
|             |                          |               | scaffold181 | Pm008255 |
|             |                          |               | scaffold181 | Pm008257 |
|             |                          |               | scaffold181 | Pm008259 |
|             |                          |               | scaffold181 | Pm008261 |
|             |                          |               | scaffold181 | Pm008262 |
|             |                          |               | scaffold181 | Pm008263 |
| <b>Pr10</b> | <i>Prunus persica</i>    | gb EU117120.1 | scaffold181 | Pm008266 |
|             |                          |               | scaffold181 | Pm008267 |
|             |                          |               | scaffold181 | Pm008268 |
|             |                          |               | scaffold181 | Pm008269 |
|             |                          |               | scaffold181 | Pm008270 |
|             |                          |               | scaffold181 | Pm008271 |
|             |                          |               | scaffold181 | Pm008272 |
|             |                          |               | scaffold181 | Pm008273 |
|             |                          |               | scaffold181 | Pm008274 |
|             |                          |               | scaffold181 | Pm008258 |
|             |                          |               | scaffold501 | Pm000928 |
|             |                          |               | scaffold501 | Pm000927 |
|             |                          |               | scaffold132 | Pm020065 |

**Supplementary Table S21. Numbers of orthologous genes found in *Prunus mume* (Pm) *Malus × domestica* (Md) *Populus trichocarpa* (Pt) *Arabidopsis thaliana* (At) *Vitis vinifera* (Vv) *Fragaria vesca* (Fv) and *Oryza sativa* (Os) that synthesis volatile molecules.**

| <b>Type gene</b>              | <b>Pm</b> | <b>Md</b> | <b>Pt</b> | <b>At</b> | <b>Vv</b> | <b>Fv</b> | <b>Os</b> |
|-------------------------------|-----------|-----------|-----------|-----------|-----------|-----------|-----------|
| <b>PAL</b>                    | 2         | 6         | 5         | 4         | 5         | 2         | 9         |
| <b>ODO1</b>                   | 2         | 2         | 4         | 1         | 2         | 2         | 1         |
| <b>BPBT</b>                   | 13        | 25        | 27        | 11        | 12        | 12        | 29        |
| <b>CFAT</b>                   | 4         | 5         | 2         | 4         | 4         | 5         | 2         |
| <b>BSMT</b>                   | 21        | 32        | 25        | 23        | 25        | 15        | 13        |
| <b>CCMT</b>                   | 12        | 34        | 23        | 21        | 25        | 12        | 11        |
| <b>BEAT</b>                   | 34        | 16        | 17        | 3         | 4         | 14        | --        |
| <b>OOMT</b>                   | 13        | 37        | 28        | 9         | 18        | 9         | 23        |
| <b>IEMT</b>                   | 2         | 44        | 30        | 15        | 12        | 14        | 13        |
| <b>EGS</b>                    | 9         | 13        | 18        | 8         | 18        | 10        | 7         |
| <b>IGS</b>                    | 2         | 10        | 17        | 8         | 17        | 10        | 7         |
| <b>POMT</b>                   | 6         | 43        | 32        | 15        | 12        | 14        | 11        |
| <b>SAMT</b>                   | 10        | 33        | 24        | 24        | 25        | 14        | 10        |
| <b>PAAS</b>                   | 6         | 4         | 5         | 2         | 5         | 6         | 7         |
| <b>γ-terpinene-synthas</b>    | 5         | 21        | 33        | 9         | 31        | 27        | 5         |
| <b>β-pinene-synthase</b>      | 4         | 20        | 34        | 10        | 29        | 27        | 5         |
| <b>germacrene</b>             | 16        | 19        | 34        | 30        | 30        | 28        | 8         |
| <b>TPS10</b>                  | 8         | 13        | 13        | 10        | 7         | 9         | 8         |
| <b>Linalool synthase</b>      | 1         | 2         | 2         | 1         | --        | 1         | 2         |
| <b>CCD</b>                    | 6         | 12        | 16        | 7         | 7         | 6         | 5         |
| <b>Limonene-3-hydroxylase</b> | 68        | 111       | 108       | 93        | 50        | 56        | 97        |

**Supplementary Table S22. The distribution of BEAT gene clusters**

| Chr  | Source | Type | Start    | End      | Score    | Strand | Phase | Attributes   |
|------|--------|------|----------|----------|----------|--------|-------|--------------|
| Pm2  | GLEAN  | mRNA | 19561090 | 19562397 | 0.541383 | +      | .     | ID=Pm006849; |
| Pm 2 | GLEAN  | mRNA | 19568381 | 19569688 | 0.801224 | +      | .     | ID=Pm006850; |
| Pm 2 | GLEAN  | mRNA | 19597787 | 19599115 | 0.999924 | +      | .     | ID=Pm006854; |
| Pm 2 | GLEAN  | mRNA | 19600651 | 19601989 | 0.737153 | +      | .     | ID=Pm006855; |
| Pm 2 | GLEAN  | mRNA | 19640968 | 19642296 | 0.999955 | +      | .     | ID=Pm006857; |
| Pm 2 | GLEAN  | mRNA | 19652034 | 19653344 | 0.999955 | +      | .     | ID=Pm006859; |
| Pm 2 | Cuff   | mRNA | 19670279 | 19672730 | 100      | +      | .     | ID=Pm006862; |
| Pm 2 | GLEAN  | mRNA | 19680726 | 19682066 | 0.978451 | -      | .     | ID=Pm006864; |
| Pm 2 | GLEAN  | mRNA | 19710735 | 19712075 | 0.978451 | -      | .     | ID=Pm006868; |
| Pm 2 | GLEAN  | mRNA | 19718018 | 19719346 | 1        | -      | .     | ID=Pm006869; |
| Pm 3 | GLEAN  | mRNA | 8086964  | 8088316  | 1        | -      | .     | ID=Pm010971; |
| Pm 3 | GLEAN  | mRNA | 8097955  | 8098455  | 0.888754 | -      | .     | ID=Pm010972; |
| Pm 3 | GLEAN  | mRNA | 8107320  | 8109158  | 0.806803 | +      | .     | ID=Pm010973; |
| Pm 3 | GLEAN  | mRNA | 8110118  | 8111458  | 1        | -      | .     | ID=Pm010974; |
| Pm 3 | GLEAN  | mRNA | 8113148  | 8114512  | 0.999903 | -      | .     | ID=Pm010975; |
| Pm 3 | GLEAN  | mRNA | 8115043  | 8116374  | 1        | -      | .     | ID=Pm010976; |
| Pm 3 | GLEAN  | mRNA | 8119387  | 8120736  | 1        | -      | .     | ID=Pm010977; |
| Pm 3 | GLEAN  | mRNA | 8121890  | 8123008  | 0.799638 | -      | .     | ID=Pm010978; |
| Pm 3 | GLEAN  | mRNA | 8129028  | 8130350  | 1        | -      | .     | ID=Pm010979; |
| Pm 3 | GLEAN  | mRNA | 8131250  | 8132614  | 1        | -      | .     | ID=Pm010980; |
| Pm 3 | GLEAN  | mRNA | 8158666  | 8159994  | 1        | -      | .     | ID=Pm010984; |
| Pm 3 | GLEAN  | mRNA | 8161540  | 8162847  | 1        | -      | .     | ID=Pm010985; |
| Pm 3 | GLEAN  | mRNA | 8169726  | 8171039  | 0.999725 | -      | .     | ID=Pm010986; |
| Pm 3 | GLEAN  | mRNA | 8192054  | 8193376  | 0.999734 | -      | .     | ID=Pm010988; |

|      |       |      |         |         |          |   |   |              |
|------|-------|------|---------|---------|----------|---|---|--------------|
| Pm 3 | GLEAN | mRNA | 8204439 | 8205755 | 1        | - | . | ID=Pm010989; |
| Pm 3 | GLEAN | mRNA | 8215947 | 8217296 | 0.56471  | - | . | ID=Pm010990; |
| Pm 3 | GLEAN | mRNA | 8225266 | 8226025 | 0.999194 | - | . | ID=Pm010991; |
| Pm 3 | GLEAN | mRNA | 8229556 | 8230902 | 0.999194 | - | . | ID=Pm010992; |
| Pm 3 | GLEAN | mRNA | 8236905 | 8238248 | 1        | - | . | ID=Pm010994; |
| Pm 3 | GLEAN | mRNA | 8247708 | 8249048 | 1        | - | . | ID=Pm010996; |
| Pm 3 | GLEAN | mRNA | 8252941 | 8255332 | 0.67247  | + | . | ID=Pm010997; |
| Pm 3 | GLEAN | mRNA | 8256871 | 8258223 | 1        | + | . | ID=Pm010998; |
| Pm 8 | GLEAN | mRNA | 916180  | 917508  | 0.996351 | - | . | ID=Pm025400; |
| Pm 8 | GLEAN | mRNA | 3451935 | 3453828 | 0.999999 | - | . | ID=Pm025612; |

## **Supplementary Methods**

### **K-mer analysis**

We determined the relationship between sequencing depth and the copy number of a certain K-mer (refers to a sequence with K base pairs e.g., 17-mer) and if the sequence error rate, heterozygosity rate and repeat rate of the genome were ignored, the K-mer of distribution should obey the Poisson theoretical distribution. The size of the genome was estimated using the total length of the sequence reads divided by the sequencing depth. And the peak value of the frequency curve represents the overall sequencing depth. We estimated the genome size as  $(N \times (L - K + 1) - B) / D = G$ , where N is the total number of sequence reads, L is the average length of sequence reads, and K is K-mer length, defined as 17 bp. B is the total number of low-frequency (frequency  $\leq 1$  in this analysis) K-mers. G is the genome size, and D is the overall depth, estimated from K-mer distribution. It must be pointed out that as the K-mer of distribution should approximate the Poisson, not all low-frequency k-mers will be errors. This might lead to an underestimate of the genome size, especially when sequencing depth is low.

The following things will also affect the genome size estimate. In the actual data, due to the sequence error, the low depth of K-mer will take up a large proportion. At the same time, for some genomes, the heterozygosity rate can cause a sub peak at the position of the half of the main peak, while a certain repeat rate can cause a repeat peak at the position of the integer multiples of the main peak. In addition, the peak position will be affected by errors that pushing the peak to the left, as errors generate more unique kmers and by presence of repeats that pushing the peak to the right. The inclusion of mitochondrial and chloroplast DNA in the sample, along with any other contamination will result in larger genome size estimation.

### **Estimation of heterozygosity rate**

The heterozygosity rate was calculated by calling the heterozygous SNPs. All the high quality reads were mapped to the genome assembly using the software SOAP2 (<http://soap.genomics.org.cn/soapaligner.html>) with the cutoff less than 5 mismatches.

Then the alignment results were analyzed for SNP mining using the SOAPsnp (<http://soap.genomics.org.cn/soapsnp.html>). The sites that met the following criteria were searched and named as criterion effective sites: quality score of consensus genotype in the SNP mining result is greater than 20; count of all the mapped best and second best base are supported by at least 4 unique reads; sequencing depth is more than 10X; and SNPs are at least 5 bp away from each other, with an additional requirement to the criterion effective sites that the number of reads supported the best base is small than four times of the number of reads supported second best base (reads supported best base/reads supported second best base < 4) were identified as heterozygotic sites. Finally, the rate of the heterozygosity was estimated as the number of heterozygotic sites divided by the number of criterion effective sites.

### **Plant material and identification of RAD markers**

The genetic maps that were used to develop the integrated map for anchoring the scaffolds were derived from F<sub>1</sub> populations, totaling 260 individuals (accession No. BJFU1210120025-0284) from the cross between ‘Fenban’ (accession No. BJFU1210120013) and ‘Kouzi Yudie’ (accession No. BJFU1210120022) from Qingdao Meiyuan. Young leaves of these *P. mume* seedlings and their parents were collected for DNA extraction. Genomic DNA was isolated from the leaves using the Plant Genomics DNA Kit (TIANGEN, Beijing, China) according to the manufacturer’s recommendations.

The RAD protocols were the same as in Chutimanitsakun<sup>15</sup>, except we used EcoRI (recognition site: 5’G<sup>^</sup>AATTC3’). Every 24 F<sub>1</sub> plants were pooled into one sequencing library with nucleotide multiplex identifiers (4 bp, 6 bp, and 8 bp) and each individual plant was barcoded. Approximately 830 Mb of 50-bp reads (3.1 Mb of reads data for each progeny on average) was generated on the NGS platform HiSeq2000. The SNP calling process was performed using the SOAP2+SOAPsnp pipeline<sup>53</sup>.

### **Identification of repetitive elements**

There are two main types of repeats in the genome, tandem repeats and interspersed repeats. We used Tandem Repeats Finder<sup>54</sup> (Version 4.04) and Repbase (composed of



many transposable elements, Versions 15.01) to identify interspersed repeats in the *P. mume* genome. We identified transposable elements in the genome at the DNA and protein levels. For the former, RepeatMasker (Version 3.2.7) was applied using a custom library (a combination of Repbase, a de novo transposable element library of the *P. mume* genome). For the latter, RepeatProteinMask, an updated tool in the RepeatMasker package, was used to conduct RM-BlastX searches against the transposable element protein database<sup>55</sup>. Identified repeats were classified into various categories.

### **RNAseq data generation**

RNA was purified using TRIzol (Invitrogen, CA, USA) from five fresh tissues (bud, fruit, leaf, root and stem). RNA sequencing libraries were constructed using the mRNA-Seq Prep Kit (Illumina, San Diego, USA). Briefly, first strand cDNA synthesis was performed with oligo-T primer and Superscript II reverse transcriptase (Invitrogen). The second strand was synthesized with *E. coli* DNA Pol I (Invitrogen, CA, USA). Double stranded cDNA was purified with a Qiaquick PCR purification kit (Qiagen), and sheared with a nebulizer (Invitrogen, CA, USA) to 100-500 bp fragments. After end repair and addition of a 3'-dA overhang the cDNA was ligated to Illumina PE adapter oligo mix (Illumina), and size selected to  $200 \pm 20$  bp fragments by gel purification. After 15 cycles of PCR amplification the 200 bp paired-end libraries were sequenced using the paired-end sequencing module (90 bp at each end) of the Illumina HiSeq 2000 platform.

### **Gene function annotation**

Genes were aligned to the SwissProt<sup>16</sup> (release 2011.6) and TrEMBL (release 2011.6) databases using BLASTP (1e-5) to determine the best match of the alignments. InterProScan<sup>17</sup> (version 4.5) motifs and domains of the genes were identified against protein databases of Pfam (release 24.0), PRINTS (release 40.0), PROSITE (release 20.52), ProDom (release 2006.1), and SMART<sup>56</sup> (release 6.0). Gene Ontology IDs for each gene were obtained by the corresponding InterPro entry. The genes were aligned against KEGG proteins<sup>18</sup> (release 58), and the matches were used to establish the KEGG pathway.

### **Identification of non-coding RNA genes**

The tRNA genes were predicted by tRNAscan-SE<sup>57</sup> (Version 1.23). For rRNA identification, the rRNA template sequences (e.g., *Arabidopsis thaliana* and rice) were aligned against the *Prunus mume* genome using blastn to identify possible rRNAs. Other noncoding RNAs, including miRNA, snRNA, were identified using INFERNAL<sup>58</sup> (Version 0.81) by searching against the Rfam database (Release 9.1).

### **Identification of CBF, PR and BEAT genes**

The CBF genes of *P. mume* were identified with *A. thaliana* CBF genes using BLASTP (E-value < 1e-10, identity > 30% and coverage > 70%). The PR genes of *P. mume* were identified with PR genes of all species using BLASTP (E-value < 1e-10, identity > 30% and coverage > 70%). The BEAT genes of *P. mume* were identified with BEAT genes (Gene Bank ID: AF043464) using BLASTP (E-value < 1e-10, identity > 30% and coverage > 70%).

### **Identification of LRR-LRK genes in the *P. mume* genome**

LRR-LRK genes contain leucine-rich repeat motifs and like kinase domains. Based on this structural profile, we used HMMER 3.0 to search LRRs (PF00560) and kinase domains (PF00560) in *P. mume* protein sequences. We extracted the kinase domain sequences of the predicted proteins and 19 *A. thaliana* sequences of previous studies and aligned them with Clustalw<sup>59</sup>. Using PHYML 3.0 software, based on this alignment, we generated a phylogenetic tree by maximum likelihood method with 100 bootstrap replicates, classifying the *P. mume* sequences into 19 LRR-LRK subfamilies.

### **Identification of NBS domain genes**

Identification of NBS genes in the *P. mume* genome were screened using HMMER 3.0 (<http://hmmer.janelia.org/software>) against the raw hidden Markov model (HMM), corresponding to the Pfam (<http://pfam.sanger.ac.uk/>) NBS (NB-ARC) family PF00931 domain (E value cutoff of 1.0). To detect TIR domains, the predicted NBS-encoding amino acid sequences were screened using the HMM model Pfam TIR PF01582 domain (E value cutoff of 1.0). To detect LRR motifs, a Pfam HMM search was used. The raw LRR\_1 (PF00560), LRR\_2 (PF07723), and LRR\_3 (PF07725)

data were downloaded and compared against the NBS-encoding amino acids using HMMER 3.0 (E value cut off 1.0). Coiled-coil (CC) motifs were analyzed using MARCOIL<sup>60</sup> with a threshold probability of 90 and double-checked using prircoil2 with a P score cutoff of 0.025.

### **Relative expressions calculation**

Firstly, we aligned the raw sequence reads to all genes using SOAPaligner or SOAP2 software included in SOAP package, and the parameters were “-m 0 -x 1000 -s 40 -l 32 -v 3 -r 2 -p 3”. Secondly, we calculated the unique mapping reads of each mapped gene and used reads per kilobase per million reads sequenced (RPKM)<sup>49</sup> method to check the value of gene expression.  $RPKM = (10^6 * C) / (NL / 10^3)$ . (Set RPKM (A) to be the expression of gene A, C to be number of reads that uniquely aligned to gene A, N to be total number of reads that uniquely aligned to all genes, and L to be the base number in the CDS of gene A.) The RPKM method is able to eliminate the influence of different gene length and sequencing discrepancy on the calculation of gene expression.

### **Supplementary references**

- 53 Li, R. *et al.* SOAP2: an improved ultrafast tool for short read alignment. *Bioinformatics* **25**, 1966-7 (2009).
- 54 Benson, G. Tandem repeats finder: a program to analyze DNA sequences. *Nucleic Acids Res* **27**, 573-80 (1999).
- 55 Jurka, J. *et al.* Repbase Update, a database of eukaryotic repetitive elements. *Cytogenet Genome Res* **110**, 462-7 (2005).
- 56 Ashburner, M. *et al.* Gene ontology: tool for the unification of biology. The Gene Ontology Consortium. *Nat Genet* **25**, 25-9 (2000).
- 57 Lowe, T.M. & Eddy, S.R. tRNAscan-SE: a program for improved detection of transfer RNA genes in genomic sequence. *Nucleic Acids Res* **25**, 955-64 (1997).
- 58 Nawrocki, E.P., Kolbe, D.L. & Eddy, S.R. Infernal 1.0: inference of RNA alignments. *Bioinformatics* **25**, 1335-7 (2009).
- 59 Larkin, M.A. *et al.* Clustal W and Clustal X version 2.0. *Bioinformatics* **23**, 2947-8 (2007).
- 60 Delorenzi, M. & Speed, T. An HMM model for coiled-coil domains and a comparison with PSSM-based predictions. *Bioinformatics* **18**, 617-25 (2002).
